# Supplementary material for: Weight loss for overweight and obese patients with prostate cancer: a study protocol of a randomised trial comparing clinic-based versus Telehealth delivered EXercise and nutrition intervention (the TelEX trial)
Source: PubMed Central journal article supplement — BMJ Open. 2022 Jun 6;12(6):e058899. doi: 10.1136/bmjopen-2021-058899 (PMC9171278; doi:10.1136/bmjopen-2021-058899), 2022-06-06
Supplement: bmjopen-2021-058899.draft_revisions.pdf [file bmjopen-2021-058899.draft_revisions.pdf]

# BMJ Open

BMJ Open is committed to open peer review. As part of this commitment we make the peer review history of every article we publish publicly available.

When an article is published we post the peer reviewers' comments and the authors' responses online. We also post the versions of the paper that were used during peer review. These are the versions that the peer review comments apply to.

The versions of the paper that follow are the versions that were submitted during the peer review process. They are not the versions of record or the final published versions. They should not be cited or distributed as the published version of this manuscript.

BMJ Open is an open access journal and the full, final, typeset and author-corrected version of record of the manuscript is available on our site with no access controls, subscription charges or pay-per-view fees (<http://bmjopen.bmj.com>).

If you have any questions on BMJ Open's open peer review process please email [info.bmjopen@bmj.com](mailto:info.bmjopen@bmj.com)

# BMJ Open

## Weight loss for overweight and obese prostate cancer patients: a randomised trial of a clinic-based versus telehealth delivered exercise and nutrition intervention (The TeLEX trial)

|                               |                                                                                                                                                                                                                                                                                                                                                                                                                                                                                                                                                                                                                                                                                                                                                                                                                                                                                                                                                                                                                                                                                     |
|-------------------------------|-------------------------------------------------------------------------------------------------------------------------------------------------------------------------------------------------------------------------------------------------------------------------------------------------------------------------------------------------------------------------------------------------------------------------------------------------------------------------------------------------------------------------------------------------------------------------------------------------------------------------------------------------------------------------------------------------------------------------------------------------------------------------------------------------------------------------------------------------------------------------------------------------------------------------------------------------------------------------------------------------------------------------------------------------------------------------------------|
| Journal:                      | <i>BMJ Open</i>                                                                                                                                                                                                                                                                                                                                                                                                                                                                                                                                                                                                                                                                                                                                                                                                                                                                                                                                                                                                                                                                     |
| Manuscript ID                 | bmjopen-2021-058899                                                                                                                                                                                                                                                                                                                                                                                                                                                                                                                                                                                                                                                                                                                                                                                                                                                                                                                                                                                                                                                                 |
| Article Type:                 | Protocol                                                                                                                                                                                                                                                                                                                                                                                                                                                                                                                                                                                                                                                                                                                                                                                                                                                                                                                                                                                                                                                                            |
| Date Submitted by the Author: | 01-Nov-2021                                                                                                                                                                                                                                                                                                                                                                                                                                                                                                                                                                                                                                                                                                                                                                                                                                                                                                                                                                                                                                                                         |
| Complete List of Authors:     | Galvão, Daniel; Edith Cowan University, Exercise Medicine Research Institute<br>Taaffe, Dennis; Edith Cowan University, Exercise Medicine Research Institute<br>Hayne, Dickon; The University of Western Australia, School of Surgery<br>Lopez, Pedro; Edith Cowan University, Exercise Medicine Research Institute<br>Lyons-Wall, P; Edith Cowan University, Exercise Medicine Research Institute<br>Tang, Colin; Sir Charles Gairdner Hospital, Department of Radiation Oncology<br>Chambers, Suzanne; University of Technology Sydney Faculty of Health<br>Devine, Amanda; Edith Cowan University, School of Medical and Health Sciences<br>Spry, Nigel; Edith Cowan University, Exercise Medicine Research Institute<br>Jeffery, Emily; Edith Cowan University, Exercise Medicine Research Institute; Curtin University<br>Kudiarasu, Christine; Edith Cowan University, Exercise Medicine Research Institute<br>Joseph, David; Sir Charles Gairdner Hospital, Department of Radiation Oncology<br>Newton, Robert; Edith Cowan University, Exercise Medicine Research Institute |
| Keywords:                     | Prostate disease < UROLOGY, Adult oncology < ONCOLOGY, Nutritional support < ONCOLOGY                                                                                                                                                                                                                                                                                                                                                                                                                                                                                                                                                                                                                                                                                                                                                                                                                                                                                                                                                                                               |
|                               |                                                                                                                                                                                                                                                                                                                                                                                                                                                                                                                                                                                                                                                                                                                                                                                                                                                                                                                                                                                                                                                                                     |

SCHOLARONE™  
Manuscripts

1  
2  
3 **Weight loss for overweight and obese prostate cancer patients: a randomised trial of a**  
4  
5 **clinic-based versus telehealth delivered exercise and nutrition intervention**  
6  
7 **(The TeLEX trial)**  
8  
9

10  
11  
12  
13  
14 Daniel A. Galvão<sup>1,2</sup>, Dennis R. Taaffe<sup>1,2</sup>, Dickon Hayne<sup>3,4</sup>, Pedro Lopez<sup>1,2</sup>,  
15  
16 Philippa Lyons-Wall<sup>1,2</sup>, Colin Tang<sup>1,5</sup>, Suzanne K. Chambers<sup>1,6</sup>, Amanda Devine<sup>2,7</sup>,  
17  
18 Nigel Spry<sup>2</sup>, Emily Jeffery<sup>1,8</sup>, Christine Kudiarasu<sup>1,2</sup>, David Joseph<sup>1,5</sup>, Robert U. Newton<sup>1,2</sup>  
19  
20  
21  
22  
23  
24  
25

26 <sup>1</sup>Exercise Medicine Research Institute, Edith Cowan University, Joondalup, WA, Australia;

27  
28 <sup>2</sup>School of Medical and Health Sciences, Edith Cowan University, Joondalup, WA, Australia;

29  
30 <sup>3</sup>Medical School, Surgery, University of Western Australia, Perth, Western Australia,

31  
32 Australia; <sup>4</sup>Urology Department, Fiona Stanley Hospital, Murdoch, Western Australia,

33  
34 Australia; <sup>5</sup>Department of Radiation Oncology, Sir Charles Gairdner Hospital, Nedlands,  
35  
36 WA, Australia; <sup>6</sup>Faculty of Health Sciences, Australian Catholic University, Brisbane, QLD,

37  
38 Australia; <sup>7</sup>Institute for Nutrition Research, Edith Cowan University, Joondalup, WA,

39  
40 Australia; <sup>8</sup>School of Public Health, Curtin University, Perth, Western Australia, Australia.  
41  
42  
43  
44  
45  
46  
47  
48  
49  
50  
51  
52  
53  
54  
55  
56  
57  
58  
59  
60

1  
2  
3 **Address for correspondence and reprint requests to:**  
4

5 Professor Daniel A. Galvão, PhD, FACSM  
6

7 Exercise Medicine Research Institute  
8

9 Edith Cowan University, 270 Joondalup Drive Joondalup  
10

11 Western Australia 6027, Australia  
12

13 Ph: 61-8-6304 3420  
14

15 E-mail: d.galvao@ecu.edu.au  
16  
17  
18  
19  
20  
21  
22  
23  
24  
25  
26  
27  
28  
29  
30  
31  
32  
33  
34  
35  
36  
37  
38  
39  
40  
41  
42  
43  
44  
45  
46  
47  
48  
49  
50  
51  
52  
53  
54  
55  
56  
57  
58  
59  
60

## ABSTRACT

**Introduction:** Obese men with prostate cancer have an increased risk for biochemical recurrence, metastatic disease, and mortality. For those undergoing androgen deprivation therapy (ADT), substantial increases in fat mass are observed in the first year of treatment. Recently, we showed that a targeted supervised clinic-based exercise and nutrition intervention can result in a substantial reduction in fat mass with muscle mass preserved in ADT-treated patients. However, the intervention needs to be accessible to all patients and not just those who can access a supervised clinic-based program. The purpose of this study is to evaluate the efficacy of telehealth delivered compared to supervised clinic-based delivered exercise and nutrition intervention in overweight/obese prostate cancer patients.

**Methods and analysis:** A single-blinded, two-arm parallel group non-inferiority randomised trial will be undertaken with 104 overweight/obese men with prostate cancer (body fat percentage  $\geq 25\%$ ) randomly allocated in a ratio of 1:1 to a telehealth delivered, virtual supervised, exercise and nutrition program or a clinic-based, face-to-face supervised exercise and nutrition program. Exercise will consist of supervised resistance and aerobic exercise performed three times per week plus additional self-directed aerobic exercise performed 4 days per week for the first 6 months. Thereafter, for months 7 to 12, the programs will be self-managed. The primary endpoint will be fat mass. Secondary endpoints include lean mass and abdominal aortic calcification, anthropometric measures and blood pressure assessment, objective measures of physical function and physical activity levels, patient-reported outcomes, and blood markers. Measurements will be undertaken at baseline and 6 months (postintervention), and at 12 months follow-up. Data will be analysed using an intention-to-treat and per protocol approaches.

1  
2  
3 **Ethics and dissemination:** Ethics has been obtained (ID: 2021-02157-GALVAO). Outcomes  
4  
5 from the study will be published in peer-reviewed academic journals and presented in  
6  
7 scientific, consumer and clinical meetings.  
8  
9

10 **Trial registration number:** ACTRN12621001312831  
11  
12  
13  
14  
15  
16  
17  
18  
19  
20  
21  
22  
23  
24  
25  
26  
27  
28  
29  
30  
31  
32  
33  
34  
35  
36  
37  
38  
39  
40  
41  
42  
43  
44  
45  
46  
47  
48  
49  
50  
51  
52  
53  
54  
55  
56  
57  
58  
59  
60

For peer review only

## ARTICLE SUMMARY

### Strengths and limitations of this study

- The TeLEX trial is a novel non-inferiority randomised trial comparing a 6-month telehealth versus clinic-based supervised exercise and nutrition program in overweight/obese men with prostate cancer on treatment or previously treated with androgen deprivation therapy, with subsequent follow-up to monitor exercise and nutrition sustaining effects following self-managed programs.
- The study proposed here will determine if a telehealth exercise and nutrition program is comparable to a supervised clinic-based exercise and nutrition program for reducing fat mass in obese men with prostate cancer. Expanding such benefits to alternative exercise settings will help improve exercise delivery to those living in under-served areas during or following treatment.
- Although the current study is limited to Western Australia, the findings will be applicable across state and international borders.

## INTRODUCTION

Prostate cancer is one of the most prevalent cancers worldwide accounting for ~1.4 million new cancer cases and more than 300,000 deaths in 2020 (1). Among the treatments available, androgen deprivation therapy (ADT) has been extensively used in the management of localised and advanced disease to delay cancer progression and improve survival (2). However, several adverse effects including increases in fat mass and reductions in muscle mass are common especially during the first year of ADT (3), increasing or aggravating obesity and metabolic syndrome (4). In turn, obesity increases the risk for complications during radical prostatectomy and radiation therapy (5, 6), as well as the risk for biochemical recurrence, metastatic disease and mortality (7-9).

We (10-17) and others (18-22) have shown that exercise can counteract several treatment-related toxicities such as reducing or mitigating fatigue, improving muscle mass and strength, bone mass, and physical function during or following ADT. However, the effects of exercise alone on fat mass are modest with reductions of ~0.7 kg observed in a recent meta-analysis of overweight men with prostate cancer (17) compared to the substantial gains of ~2.3 kg that can be experienced during the first year of treatment (3). As a result, exercise undertaken in trials to date has been largely insufficient to counteract the treatment-related gains in fat mass, which may be especially problematic for men already overweight or obese.

Recently, we presented new evidence that in obese ADT-treated prostate cancer patients, a targeted and supervised clinic-based 12-week exercise program allied with protein supplementation and energy restriction resulted in a substantial reduction of ~2.8 kg in fat mass while preserving muscle mass (23). However, it is necessary to expand such programs to alternative exercise settings where overweight/obese patients living in under-served areas, such as those in regional and rural settings, or those without the financial capacity to access such programs. Recently, telehealth has emerged as a viable method to deliver health-related



1  
2  
3 services such as exercise and nutrition interventions (24), and if effective in this group of  
4  
5 prostate cancer patients, could be available at a lower cost and reach larger numbers of patients  
6  
7 irrespective of their geographical location. Therefore, we propose to undertake a 6-month non-  
8  
9 inferiority randomised trial to evaluate the efficacy of a telehealth delivered compared to a  
10  
11 supervised clinic-based delivered exercise and nutrition intervention in overweight and obese  
12  
13 prostate cancer patients. We will compare our previous reported supervised clinic-based  
14  
15 exercise and nutrition weight loss program (27) to a program modified for delivery via  
16  
17 telehealth in overweight/obese men with prostate cancer, with subsequent follow-up over 6  
18  
19 months to monitor sustainability. The primary outcome will be fat mass with secondary  
20  
21 outcomes including lean mass and objective and patient-reported outcomes.  
22  
23  
24  
25  
26  
27

## 28 **METHODS AND ANALYSIS**

29  
30 This is a single-blinded, two-arm parallel group non-inferiority randomised trial  
31  
32 designed to examine the efficacy of implementing a Telehealth delivered, virtual supervised,  
33  
34 Exercise and Nutrition (TENUT) program compared to a clinic-based, face-to-face supervised  
35  
36 Exercise and Nutrition (CENUT) program on fat mass in overweight/obese men with prostate  
37  
38 cancer (Figure 1). The protocol has been approved (ID: 2021-02157-GALVAO) by the Edith  
39  
40 Cowan University Human Research Ethics Committee.  
41  
42  
43

### 44 **Patients and methods**

45  
46 One-hundred and four overweight/obese men (52 participants per arm) undergoing  
47  
48 treatment or previously treated for prostate cancer involving ADT will be identified and  
49  
50 recruited through attending physicians (general practitioner / radiation oncologist / urologist),  
51  
52 specialist nurses, advertisements in local newspapers and presentations at cancer support  
53  
54 groups and related events in Western Australia. Inclusion criteria are: 1) body fat percentage  
55  
56  $\geq 25\%$ , (25) and 2) ability to walk 400-m. Exclusion criteria are: 1) acute illness or any  
57  
58  
59  
60

1  
2  
3 musculoskeletal, cardiovascular or neurological disorder that could inhibit exercise  
4 performance or put participants at risk from exercising, and 2) inability to read and understand  
5 English. Eligible patients will undertake baseline measurements prior to randomisation. All  
6 patients must provide written informed consent prior to participation in addition to a physician  
7 clearance form. The study coordinator will obtain the consent and clearance forms from  
8 patients and physicians. Patients with metastases will be required to present their last bone  
9 imaging scan to establish location and extent of bone lesions with the exercise prescription  
10 modified according to Galvão et al.(26) and to the Exercise and Sports Science Australia  
11 exercise and cancer position statement (27). All data relevant to the study will be kept on  
12 password-encrypted computers accessible only by study investigators situated in the Exercise  
13 Medicine Research Institute (Perth, WA, Australia).

### 28 **Patient and public involvement**

30 We conducted a health consumer workshop reaching out to 14 men with prostate cancer  
31 that had completed our most recent exercise and nutrition intervention study (23). The men  
32 were overweight or obese and completed the 3-month diet and exercise program in our exercise  
33 clinics. We sought their input on the program they had just completed and how they would  
34 view a telehealth intervention. This input was used to inform this project and ensure that it  
35 engages participants in a respectful, ethical, and impactful way. We also worked closely with  
36 the Prostate Cancer Foundation of Australia (PCFA), their support groups and state offices. As  
37 the project evolves, PCFA will assist in the dissemination of findings to cancer support groups  
38 and the general public, while study participants will receive their individual results as well as  
39 overall study findings.  
40  
41  
42  
43  
44  
45  
46  
47  
48  
49  
50  
51  
52  
53  
54  
55  
56  
57  
58  
59  
60

## Randomisation

Patients will be randomly allocated by a computer random assignment program to the two study arms: 1) TENUT and 2) CENUT in a ratio of 1:1, subject to maintaining approximate balance regarding stratification for time on ADT (< 6 months, ≥ 6 months, and previous ADT). An investigator with no patient contact will be responsible for randomisation. The allocation sequence will be concealed from exercise physiologists involved in assigning participants to groups or conducting the study measures. In addition, participants will be requested to not reveal their group allocation to any members of the research team. The exercise will be provided by exercise physiologists not in the research team or performing the tests.

## Measurements

All measurement study endpoints will take place at baseline, 6 months (end of intervention) and 12 months (6 months post intervention) and are presented in Figure 2. All assessment tools/procedures have established validity and reliability and are used widely in clinical research including by our team (10-15).

## Study endpoints

### Primary study endpoint

#### Fat mass

Regional and whole-body fat mass will be derived from a whole-body dual-energy X-ray absorptiometry (DXA; Horizon A, Hologic, Waltham, MA) scan. Trunk adiposity, visceral fat and adipose indices will be assessed using standard procedures (13, 14, 28).

### Secondary study endpoints

#### Lean mass and abdominal aortic calcification

Regional and whole-body lean mass will be assessed by DXA. In addition, lateral spine images will be collected for abdominal aortic calcification assessment as a surrogate of cardiovascular disease (29).

### **Anthropometric measures and blood pressure assessment**

Central adiposity will be assessed by waist circumference (WC) and hip circumference (HC) (30). WC will be measured at the level of the narrowest point between the lower costal (rib) border and the iliac crest. HC will be measured at the level of the greatest posterior protuberance of the buttocks which usually corresponds anteriorly to the level of the symphysis pubis. Body mass index ( $\text{kg}/\text{m}^2$ ) will also be used to assess weight (kg) relative to height (m) squared. A validated oscillometric device (HEM-705CP, Omron Corporation, Japan) will be used to record brachial systolic and diastolic blood pressure at the dominant arm in triplicate.

### **Objective measures of physical function and physical activity levels**

A battery of standard tests will be used to assess physical function: 1) one-repetition maximum (1RM) test for chest press and leg press strength, 2) submaximal cycle ergometer test for estimation of maximal oxygen uptake ( $\text{VO}_2\text{max}$ ), 3) 400-m walk test for aerobic capacity and walking endurance, 4) repeated chair rise for lower body function, 5) 6-m usual and fast walk for gait speed, and 6) 6-m backwards tandem walk for dynamic balance (11-15, 31). Self-reported physical activity will be assessed by the leisure score index from the Godin Leisure-Time Exercise Questionnaire modified to include a question on resistance training (32).

### **Nutritional intervention adherence and monitoring**

Adherence to dietary recommendations will be assessed using an adapted customised adherence questionnaire (23, 33, 34) designed to provide an estimated frequency of consumption and number of serves of food of interest based on the nutrition advice given. Food items of interest include fruit and vegetables, nuts, high protein foods, dairy, grains and cereals, beverages and alcoholic drinks, discretionary and take-away items. Patients will be asked 25 yes/no questions where a score of 1 is given if the patient met a predetermined desired outcome, or a 0 if they didn't. A higher total score indicates greater compliance with a maximum score

1  
2  
3 of 25. For nutrition monitoring, patients will complete a 3-day weighed food record (3d-WR)  
4  
5 over 3 consecutive days (1 weekend day and 2 weekdays) at baseline, 6 and 12 months. This  
6  
7 will provide an estimate of total energy intake ( $\text{kJ}\cdot\text{d}^{-1}$ ) and macro- and micronutrients  
8  
9 consumed. The 3d-WR data will be analysed using FoodWorks (FoodWorks 10 Professional,  
10  
11 Xyris Software Pty Ltd, QLD, Australia).  
12  
13

### 14 **Patient-reported outcomes**

15  
16 Health-related quality of life will be assessed using the Medical Outcomes Short Form  
17  
18 36 (SF-36v2) (35), while cancer-related quality of life will be measured using the EORTC  
19  
20 QLQ-C30 (36) and the EORTC-PR25 for disease-specific health-related quality of life (37).  
21  
22 Fatigue will be assessed using the Functional assessment of Chronic Illness Therapy-Fatigue  
23  
24 (FACIT-Fatigue) questionnaire. The Brief Symptom Inventory-18 (BSI-18) will be used to  
25  
26 assess psychological distress across the domains of anxiety, depression and somatisation, and  
27  
28 global distress severity (38). These validated instruments are an integrated system to assess  
29  
30 quality of life and psychological distress in cancer patients and has been extensively employed  
31  
32 in clinical trials of exercise medicine (10-13, 39). In addition, the Masculinity in Chronic  
33  
34 Disease Index will be used to assess the extent to which men identify with six masculine values:  
35  
36 strength; sexual importance/priority; family responsibilities; emotional self-reliance; optimistic  
37  
38 capacity and action approach (40, 41), while an adapted Working Alliance Inventory for  
39  
40 General Practice tool will be used to assess the mediations between exercise and nutrition  
41  
42 delivery and adherence as well as benefits derived from these programs in men with prostate  
43  
44 cancer (42, 43).  
45  
46  
47  
48  
49

### 50 **Blood markers**

51  
52 Testosterone, prostate specific antigen (PSA), lipid profile, insulin, glucose, glycated  
53  
54 haemoglobin ( $\text{HbA}_{1c}$ ), C-reactive protein, adiponectin, leptin, insulin-like-growth factor-1  
55  
56 (IGF1), IGF-binding protein-3 (IGFBP3), interleukin 6 (IL6) and tumour necrosis factor (TNF-  
57  
58  
59  
60

1  
2  
3  $\alpha$ ) will be measured commercially by an accredited Australian National Association of Testing  
4  
5 Authorities (NATA) laboratory (Pathwest Diagnostics, Perth, Western Australia) (11, 13, 23).  
6  
7

### 8 **Safety and monitoring**

9  
10 Patients will be monitored for any adverse events during training and testing by the  
11  
12 Accredited Exercise Physiologists (AEP) with study clinicians overseeing aspects of patient  
13  
14 management where required.  
15  
16

### 17 **Exercise interventions**

#### 18 **Telehealth and Face-To-Face delivered exercise and nutrition programs**

19  
20 The interventions will consist of 300 min per week of moderate to vigorous exercise  
21  
22 per week for 6 months comprising a supervised resistance and aerobic exercise program  
23  
24 performed three times per week for 60 min per session delivered face-to-face in an exercise  
25  
26 clinic or via telehealth by AEP, plus 30 min of moderate/vigorous physical activity self-  
27  
28 managed 4 days per week. For both TENUT and CENUT, resistance training will comprise 2-4  
29  
30 sets for 6-8 exercises targeting the major upper and lower body muscle groups performed using  
31  
32 equipment such as exercise machines, dumbbells and elastic bands at an intensity of 6-12  
33  
34 repetition maximum (RM; i.e. the maximal weight that can be lifted 6 to 12 times which is  
35  
36 equivalent to ~60-85% of 1RM). The supervised aerobic exercise component will involve 15  
37  
38 to 20 minutes of moderate to vigorous intensity cardiovascular exercise using a variety of  
39  
40 modes such as walking, jogging or cycling. This approach has been extensively used by our  
41  
42 team (11, 13, 14, 23), providing optimal stimulus while maximising safety, compliance and  
43  
44 retention in clinic-based exercise programs. The self-directed aerobic component will comprise  
45  
46 these modes for 30 minutes 4 days per week. For the telehealth intervention we will implement  
47  
48 the latest digital platforms that we developed during COVID-19 restrictions in 2020 and related  
49  
50 technological advancements in wearable sensors, online monitoring, cloud-based platforms,  
51  
52 and video chat. Participants will receive their exercise program via their smart device or  
53  
54  
55  
56  
57  
58  
59  
60

1  
2  
3 computer, communicate with the AEP and fellow participants by video chat, and be monitored  
4  
5 in real-time through the internet.  
6

7  
8 For the nutrition intervention, all participants will receive a total of 5 face-to-face or  
9  
10 online consultations over the first 6 months of intervention (baseline, 2, 12, 18, 24 weeks) with  
11  
12 an Accredited Practising Dietitian (APD) aiming to: 1) achieve an energy deficit of 2100-4200  
13  
14 kJ/day (500-1000 kcal/day); 2) reducing discretionary items including alcoholic drinks and  
15  
16 foods containing refined sugars; and 3) maintain protein intake. In addition, participants will  
17  
18 consume 40 g of a whey protein supplement 3 times per week immediately after the resistance  
19  
20 exercise sessions.  
21  
22

23  
24 At the end of the first 6-month period, participants from CENUT will receive a booklet  
25  
26 with detailed information about a home exercise prescription, while the telehealth program will  
27  
28 be maintained without supervision for participants from TENUT. Instructions on performing  
29  
30 the home-based exercises and achieving dietary recommendations will be provided by the AEP  
31  
32 and APD.  
33  
34

### 35 **Calculation of sample size and statistical analysis**

36

37  
38 From our previous research in obese prostate cancer patients we reported that the  
39  
40 standard deviation for change in fat mass equates to 2.6 kg (mean change of -2.8 kg) following  
41  
42 3 months of combined resistance and aerobic exercise with protein supplementation and caloric  
43  
44 restriction (23). A priori, 43 patients per group will be required to achieve 80% power at an  $\alpha$   
45  
46 level of .025 (one-tailed) and demonstrate a non-inferiority limit below 1.4 kg of fat mass  
47  
48 between the TENUT and CENUT groups. Therefore, to adequately ensure that we have a  
49  
50 sufficient number of participants at the end of the study (accounting for a drop-out rate of 20%),  
51  
52 52 participants will be randomised to each group.  
53  
54

55  
56 Normality of the data will be assessed using the Kolmogorov-Smirnov test. Baseline  
57  
58 characteristics will be analysed using Student's t tests or the Mann-Whitney U-test for  
59  
60

1  
2  
3 continuous measures, as appropriate, and Chi-square for categorical variables. For the study  
4  
5 outcomes, data will be analysed using intention-to-treat and per protocol approaches. Testing  
6  
7 for longitudinal changes will be performed using linear mixed models (LMM). Non-inferiority  
8  
9 of the intervention for the primary outcome will be implied if the lower limit of a 1-sided 95%  
10  
11 confidence interval of the difference between groups between baseline and 6 months is within  
12  
13 the pre-stated limit of 1.4 kg for fat mass change.  
14  
15

### 16 17 **Ethics and dissemination**

18  
19 Outcomes from the study will be published in peer-reviewed academic journals and  
20  
21 presented in scientific, consumer and clinical meetings. The study investigators and trial  
22  
23 coordinator will have access to the data.  
24  
25

## 26 27 28 **DISCUSSION**

29  
30 Men with prostate cancer undergoing ADT experience increased fat and reduced  
31  
32 muscle mass placing them at increased risk of morbidity and mortality from cardiovascular and  
33  
34 metabolic diseases (3, 8, 44, 45). Targeted exercise medicine interventions for men with  
35  
36 prostate cancer can improve quality of life, reduce treatment-related side-effects, and improve  
37  
38 both physical and psychological health (10-17). More recently, we have shown that in obese  
39  
40 men with prostate cancer, a targeted supervised clinic-based exercise and nutrition intervention  
41  
42 resulted in a substantial reduction in fat mass (~3 kg) while muscle mass was preserved (23).  
43  
44 This is a new finding, however, availability of these clinic-based services and patient support  
45  
46 is limited and the vast majority of patients cannot access due to issues of distance, transport,  
47  
48 inconvenience and financial capacity. The result is an unacceptable disparity between patients  
49  
50 that have access to such supportive care and those that do not, resulting in suboptimal quality  
51  
52 of life and ultimately survival for those men that cannot access current best practice care.  
53  
54  
55  
56  
57  
58  
59  
60



1  
2  
3  
4  
5  
6  
7  
8  
9  
10  
11  
12  
13  
14  
15  
16  
17  
18  
19  
20  
21  
22  
23  
24  
25  
26  
27  
28  
29  
30  
31  
32  
33  
34  
35  
36  
37  
38  
39  
40  
41  
42  
43  
44  
45  
46  
47  
48  
49  
50  
51  
52  
53  
54  
55  
56  
57  
58  
59  
60

These issues are particularly pertinent to patients in Western Australia due to our geography (comprises about a third of the country with only one major metropolitan area) resulting in the majority of men with prostate cancer having limited or no capacity to access exercise and nutrition programs face-to-face with health professionals. Access to the latest exercise medicine and nutrition services has been unfortunately further impacted by the COVID-19 pandemic due to personal isolation, physical distancing and changes to public transport and procedures within cancer care clinics (46). Telehealth exercise and nutrition interventions have the potential to overcome most if not all these issues providing high-quality, effective and safe supportive care at a time and in a place of the patient's choosing. Translation of the outcomes of this research can be immediate. The underlying knowledge required to take this program out into the community will be a result of the research project.

## REFERENCES

1. Sung H, Ferlay J, Siegel RL, Laversanne M, Soerjomataram I, Jemal A, et al. Global cancer statistics 2020: GLOBOCAN estimates of incidence and mortality worldwide for 36 cancers in 185 countries. *CA Cancer J Clin*. 2021.
2. D'Amico AV, Chen MH, Renshaw AA, Loffredo M, Kantoff PW. Androgen suppression and radiation vs radiation alone for prostate cancer: a randomized trial. *Jama*. 2008;299(3):289-95.
3. Galvao DA, Spry NA, Taaffe DR, Newton RU, Stanley J, Shannon T, et al. Changes in muscle, fat and bone mass after 36 weeks of maximal androgen blockade for prostate cancer. *BJU Int*. 2008;102(1):44-7.
4. Bhindi B, Locke J, Alibhai SMH, Kulkarni GS, Margel DS, Hamilton RJ, et al. Dissecting the association between metabolic syndrome and prostate cancer risk: analysis of a large clinical cohort. *Eur Urol*. 2015;67(1):64-70.
5. Di Bella CM, Howard LE, Oyekunle T, De Hoedt AM, Salama JK, Song H, et al. Abdominal and pelvic adipose tissue distribution and risk of prostate cancer recurrence after radiation therapy. *Prostate*. 2020;80(14):1244-52.
6. Uchida T, Higure T, Kawakami M, Nakano M, Nakajima N, Kim H, et al. What factors affect the operative time of robot-assisted laparoscopic radical prostatectomy? *Surg Endosc*. 2020; Online ahead of print.
7. Bonn SE, Wiklund F, Sjolander A, Szulkin R, Stattin P, Holmberg E, et al. Body mass index and weight change in men with prostate cancer: progression and mortality. *Cancer Causes Control*. 2014;25(8):933-43.
8. Cao Y, Ma J. Body mass index, prostate cancer-specific mortality, and biochemical recurrence: a systematic review and meta-analysis. *Cancer Prev Res (Phila)*. 2011;4(4):486-501.

- 1  
2  
3 9. Troeschel AN, Hartman TJ, Jacobs EJ, Stevens VL, Gansler T, Flanders WD, et al.  
4  
5 Postdiagnosis body mass index, weight change, and mortality from prostate cancer,  
6  
7 cardiovascular disease, and all causes among survivors of nonmetastatic prostate cancer. *J Clin*  
8  
9 *Oncol.* 2020;38(18):2018-27.
- 10  
11  
12 10. Galvão DA, Newton RU, Chambers SK, Spry N, Joseph D, Gardiner RA, et al.  
13  
14 Psychological distress in men with prostate cancer undertaking androgen deprivation therapy:  
15  
16 modifying effects of exercise from a year-long randomized controlled trial. *Prostate Cancer*  
17  
18 *Prostatic Dis.* 2021.
- 19  
20  
21 11. Galvao DA, Spry N, Denham J, Taaffe DR, Cormie P, Joseph D, et al. A multicentre  
22  
23 year-long randomised controlled trial of exercise training targeting physical functioning in men  
24  
25 with prostate cancer previously treated with androgen suppression and radiation from TROG  
26  
27 03.04 RADAR. *Eur Urol.* 2014;65(5):856-64.
- 28  
29  
30 12. Galvao DA, Taaffe DR, Spry N, Cormie P, Joseph D, Chambers SK, et al. Exercise  
31  
32 Preserves Physical Function in Prostate Cancer Patients with Bone Metastases. *Med Sci Sports*  
33  
34 *Exerc.* 2018;50(3):393-9.
- 35  
36  
37 13. Galvao DA, Taaffe DR, Spry N, Joseph D, Newton RU. Combined resistance and  
38  
39 aerobic exercise program reverses muscle loss in men undergoing androgen suppression  
40  
41 therapy for prostate cancer without bone metastases: a randomized controlled trial. *J Clin*  
42  
43 *Oncol.* 2010;28(2):340-7.
- 44  
45  
46 14. Newton RU, Galvao DA, Spry N, Joseph D, Chambers SK, Gardiner RA, et al. Exercise  
47  
48 mode specificity for preserving spine and hip bone mineral density in prostate cancer patients.  
49  
50 *Med Sci Sports Exerc.* 2019;51(4):607-14.
- 51  
52  
53 15. Taaffe DR, Galvao DA, Spry N, Joseph D, Chambers SK, Gardiner RA, et al.  
54  
55 Immediate versus delayed exercise in men initiating androgen deprivation: effects on bone  
56  
57 density and soft tissue composition. *BJU Int.* 2019;123(2):261-9.
- 58  
59  
60

- 1  
2  
3 16. Lopez P, Taaffe DR, Newton RU, Buffart LM, Galvao DA. What is the minimal dose  
4 for resistance exercise effectiveness in prostate cancer patients? Systematic review and meta-  
5 analysis on patient-reported outcomes. *Prostate Cancer Prostatic Dis.* 2020.  
6  
7  
8  
9  
10 17. Lopez P, Taaffe DR, Newton RU, Galvao DA. Resistance exercise dosage in men with  
11 prostate cancer: Systematic review, meta-analysis, and meta-regression. *Med Sci Sports Exerc.*  
12 2021;53(3):459-69.  
13  
14  
15  
16  
17 18. Bourke L, Gilbert S, Hooper R, Steed LA, Joshi M, Catto JW, et al. Lifestyle changes  
18 for improving disease-specific quality of life in sedentary men on long-term androgen-  
19 deprivation therapy for advanced prostate cancer: a randomised controlled trial. *Eur Urol.*  
20 2014;65(5):865-72.  
21  
22  
23  
24  
25  
26 19. Segal RJ, Reid RD, Courneya KS, Malone SC, Parliament MB, Scott CG, et al.  
27 Resistance exercise in men receiving androgen deprivation therapy for prostate cancer. *J Clin*  
28 *Oncol.* 2003;21(9):1653-9.  
29  
30  
31  
32  
33 20. Segal RJ, Reid RD, Courneya KS, Sigal RJ, Kenny GP, Prud'Homme DG, et al.  
34 Randomized controlled trial of resistance or aerobic exercise in men receiving radiation therapy  
35 for prostate cancer. *J Clin Oncol.* 2009;27(3):344-51.  
36  
37  
38  
39  
40 21. Ndjavera W, Orange ST, O'Doherty AF, Leicht AS, Rochester M, Mills R, et al.  
41 Exercise-induced attenuation of treatment side-effects in patients with newly diagnosed  
42 prostate cancer beginning androgen-deprivation therapy: a randomised controlled trial. *BJU*  
43 *Int.* 2020;125(1):28-37.  
44  
45  
46  
47  
48  
49 22. Winters-Stone KM, Dobek JC, Bennett JA, Maddalozzo GF, Ryan CW, Beer TM.  
50 Skeletal response to resistance and impact training in prostate cancer survivors. *Med Sci Sports*  
51 *Exerc.* 2014;46(8):1482-8.  
52  
53  
54  
55  
56  
57  
58  
59  
60

- 1  
2  
3 23. Wilson RL, Newton RU, Taaffe DR, Hart NH, Lyons-Wall P, Galvão DA. Weight loss  
4 for obese prostate cancer patients on androgen deprivation therapy. *Med Sci Sports Exerc.*  
5 2021;53(3):470-8.  
6  
7  
8  
9  
10 24. Collins IM, Burbury K, Underhill CR. Teletrials: implementation of a new paradigm  
11 for clinical trials. *Med J Aust.* 2020;213(6):263-5.e1.  
12  
13  
14 25. Kennedy AP, Shea JL, Sun G. Comparison of the classification of obesity by BMI vs.  
15 dual-energy X-ray absorptiometry in the Newfoundland population. *Obesity (Silver Spring).*  
16 2009;17(11):2094-9.  
17  
18  
19  
20 26. Galvao DA, Taaffe DR, Spry N, Cormie P, Joseph D, Chambers SK, et al. Exercise  
21 Preserves Physical Function in Prostate Cancer Patients with Bone Metastases. *Med Sci Sport*  
22 *Exer.* 2018;50(3):393-9.  
23  
24  
25  
26  
27 27. Hayes SC, Newton RU, Spence RR, Galvão DA. The Exercise and Sports Science  
28 Australia position statement: Exercise medicine in cancer management. *J Sci Med Sport.*  
29 2019;22(11):1175-99.  
30  
31  
32  
33 28. Messina C, Albano D, Gitto S, Tofanelli L, Bazzocchi A, Ulivieri FM, et al. Body  
34 composition with dual energy X-ray absorptiometry: from basics to new tools. *Quant Imaging*  
35 *Med Surg.* 2020;10(8):1687-98.  
36  
37  
38  
39 29. Lewis JR, Schousboe JT, Lim WH, Wong G, Wilson KE, Zhu K, et al. Long-Term  
40 Atherosclerotic Vascular Disease Risk and Prognosis in Elderly Women With Abdominal  
41 Aortic Calcification on Lateral Spine Images Captured During Bone Density Testing: A  
42 Prospective Study. *J Bone Miner Res.* 2018;33(6):1001-10.  
43  
44  
45  
46  
47 30. Evans DJ, Hoffmann RG, Kalkhoff RK, Kissebah AH. Relationship of androgenic  
48 activity to body fat topography, fat cell morphology, and metabolic aberrations in  
49 premenopausal women. *J Clin Endocrinol Metab.* 1983;57(2):304-10.  
50  
51  
52  
53  
54  
55  
56  
57  
58  
59  
60

- 1  
2  
3 31. Mijwel S, Cardinale D, Ekblom-Bak E, Sundberg CJ, Wengström Y, Rundqvist H.  
4 Validation of 2 Submaximal Cardiorespiratory Fitness Tests in Patients With Breast Cancer  
5 Undergoing Chemotherapy. *Rehabil Oncol*. 2016;34(4):137-43.  
6  
7  
8  
9  
10 32. Godin G, Shephard RJ. A simple method to assess exercise behavior in the community.  
11 *Can J Appl Sport Sci*. 1985;10(3):141-6.  
12  
13  
14 33. Martínez-González MA, García-Arellano A, Toledo E, Salas-Salvadó J, Buil-Cosiales  
15 P, Corella D, et al. A 14-item Mediterranean diet assessment tool and obesity indexes among  
16 high-risk subjects: the PREDIMED trial. *PLoS One*. 2012;7(8):e43134.  
17  
18  
19  
20 34. Erdrich S, Bishop KS, Karunasinghe N, Han DY, Ferguson LR. A pilot study to  
21 investigate if New Zealand men with prostate cancer benefit from a Mediterranean-style diet.  
22 *PeerJ*. 2015;3:e1080.  
23  
24  
25  
26 35. Ware JE, Jr., Sherbourne CD. The MOS 36-item short-form health survey (SF-36). I.  
27 Conceptual framework and item selection. *Med Care*. 1992;30(6):473-83.  
28  
29  
30  
31 36. Aaronson NK, Ahmedzai S, Bergman B, Bullinger M, Cull A, Duez NJ, et al. The  
32 European Organization for Research and Treatment of Cancer QLQ-C30: a quality-of-life  
33 instrument for use in international clinical trials in oncology. *J Natl Cancer Inst*.  
34 1993;85(5):365-76.  
35  
36  
37  
38 37. Chu D, Popovic M, Chow E, Cella D, Beaumont JL, Lam H, et al. Development,  
39 characteristics and validity of the EORTC QLQ-PR25 and the FACT-P for assessment of  
40 quality of life in prostate cancer patients. *J Comp Eff Res*. 2014;3(5):523-31.  
41  
42  
43  
44 38. Derogatis LR. BSI 18, Brief Symptom Inventory 18: Administration, scoring and  
45 procedures manual: NCS Pearson, Incorporated; 2001.  
46  
47  
48  
49 39. Galvao DA, Taaffe DR, Chambers SK, Fairman CM, Spry N, Joseph D, et al. Exercise  
50 intervention and sexual function in advanced prostate cancer: a randomised controlled trial.  
51 *BMJ Support Palliat Care*. 2020.  
52  
53  
54  
55  
56  
57  
58  
59  
60

- 1  
2  
3 40. Chambers SK, Hyde MK, Oliffe JL, Zajdlewicz L, Lowe A, Wootten AC, et al.  
4 Measuring masculinity in the context of chronic disease. *Psychology of Men & Masculinity*.  
5  
6 Measuring masculinity in the context of chronic disease. *Psychology of Men & Masculinity*.  
7  
8 2016;17(3):228-42.  
9
- 10 41. Hyde MK, Zajdlewicz L, Wootten AC, Nelson CJ, Lowe A, Dunn J, et al. Medical  
11 Help-Seeking for Sexual Concerns in Prostate Cancer Survivors. *Sex Med*. 2016;4(1):e7-e17.  
12  
13
- 14 42. Sturgiss EA, Rieger E, Haesler E, Ridd MJ, Douglas K, Galvin SL. Adaption and  
15 validation of the Working Alliance Inventory for General Practice: qualitative review and  
16 cross-sectional surveys. *Fam Pract*. 2019;36(4):516-22.  
17  
18
- 19 43. Tracey TJ, Kokotovic AM. Factor structure of the working alliance inventory.  
20 *Psychological Assessment: A journal of consulting and clinical psychology*. 1989;1(3):207.  
21  
22
- 23 44. Keating NL, O'Malley AJ, Smith MR. Diabetes and cardiovascular disease during  
24 androgen deprivation therapy for prostate cancer. *J Clin Oncol*. 2006;24(27):4448-56.  
25  
26
- 27 45. Smith MR, Lee H, Nathan DM. Insulin sensitivity during combined androgen blockade  
28 for prostate cancer. *J Clin Endocrinol Metab*. 2006;91(4):1305-8.  
29  
30
- 31 46. Lopez P, Taaffe DR, Newton RU, Spry N, Shannon T, Frydenberg M, et al. Can  
32 Exercise Adaptations Be Maintained in Men with Prostate Cancer Following Supervised  
33 Programmes? Implications to the COVID-19 Landscape of Urology and Clinical Exercise. *Eur*  
34 *Urol Open Sci*. 2020;21:47-50.  
35  
36  
37  
38  
39  
40  
41  
42  
43  
44  
45  
46  
47  
48  
49  
50  
51  
52  
53  
54  
55  
56  
57  
58  
59  
60

1  
2  
3 **AUTHORS' CONTRIBUTIONS:** DAG, DRT, DH, PL, PLW, CT, SKC, NS, CK and RUN  
4  
5 collaboratively developed the concept and protocol, including intervention, outcomes of  
6  
7 interests, and planned data analysis procedures. AD, EJ, DJ further contributed to the study  
8  
9 protocol. DAG, DRT, DH, PL, PLW, CT, SKC, NS, CK and RUN contributed to writing,  
10  
11 reviewing, editing and final approval of the manuscript. AD, EJ, DJ further contributed to  
12  
13 editing and final approval of the manuscript.  
14  
15

16  
17 **FUNDING STATEMENT:** This work was supported by Cancer Council Western Australia  
18  
19 Prostate Cancer Research Initiative grant (2021-2023 Prostate Cancer Research Initiative).  
20  
21 DAG and RUN are funded by a NHMRC CRE in Prostate Cancer Survivorship. PL is  
22  
23 supported by the National Health and Medical Research Council (NHMRC) Centre of Research  
24  
25 Excellence (CRE) in Prostate Cancer Survivorship Scholarship.  
26  
27

28 **COMPETING INTERESTS STATEMENT:** None declared.  
29

30 **ETHICS APPROVAL:** Edith Cowan University Human Ethics Committee (ID: 2021-02157-  
31  
32 GALVAO)  
33  
34  
35  
36  
37  
38  
39  
40  
41  
42  
43  
44  
45  
46  
47  
48  
49  
50  
51  
52  
53  
54  
55  
56  
57  
58  
59  
60



1  
2  
3 **FIGURE LEGENDS**  
4

5 **Figure 1.** CONSORT diagram depicting the of participants throughout the trial.  
6

7  
8 **Figure 2.** Study design, exercise and nutrition interventions and timeline assessments.  
9

10  
11  
12  
13  
14  
15  
16  
17  
18  
19  
20  
21  
22  
23  
24  
25  
26  
27  
28  
29  
30  
31  
32  
33  
34  
35  
36  
37  
38  
39  
40  
41  
42  
43  
44  
45  
46  
47  
48  
49  
50  
51  
52  
53  
54  
55  
56  
57  
58  
59  
60

For peer review only

1  
2  
3  
4  
5  
6  
7  
8  
9  
10  
11  
12  
13  
14  
15  
16  
17  
18  
19  
20  
21  
22  
23  
24  
25  
26  
27  
28  
29  
30  
31  
32  
33  
34  
35  
36  
37  
38  
39  
40  
41  
42  
43  
44

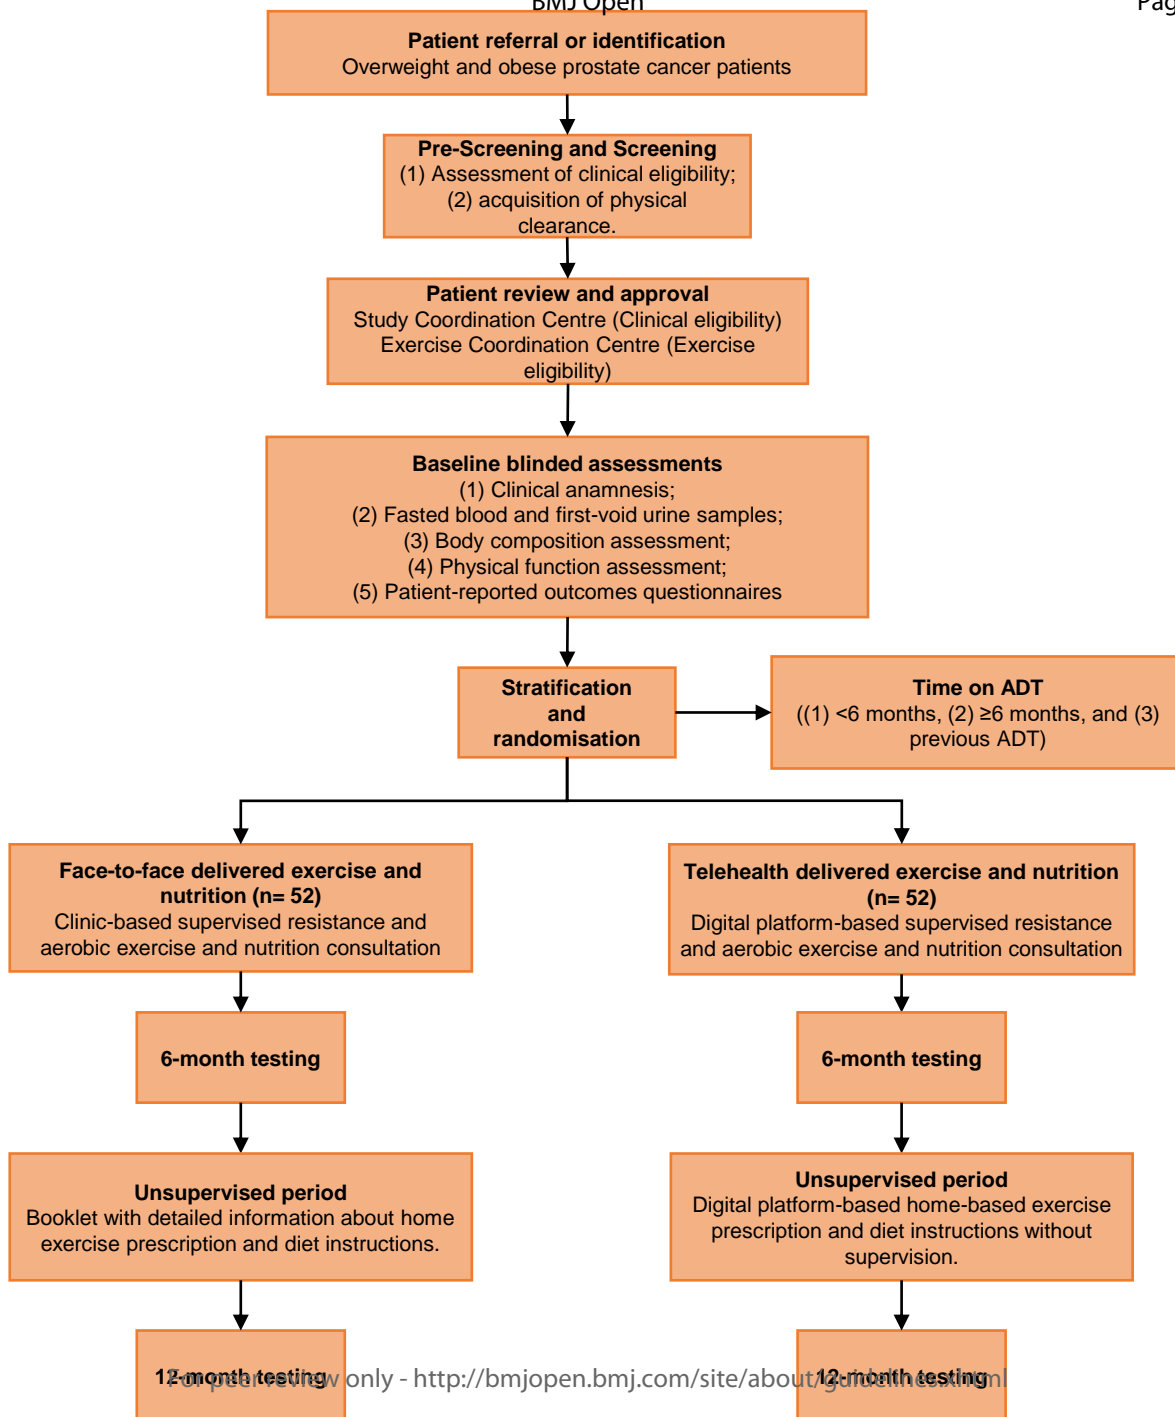

1  
2  
3  
4  
5  
6  
7  
8  
9  
10  
11  
12  
13  
14  
15  
16  
17  
18  
19  
20  
21  
22  
23  
24  
25  
26  
27  
28  
29  
30  
31  
32  
33  
34  
35  
36  
37  
38  
39  
40  
41  
42  
43  
44  
45  
46  
47  
48  
49  
50  
51  
52  
53  
54  
55  
56  
57  
58  
59  
60

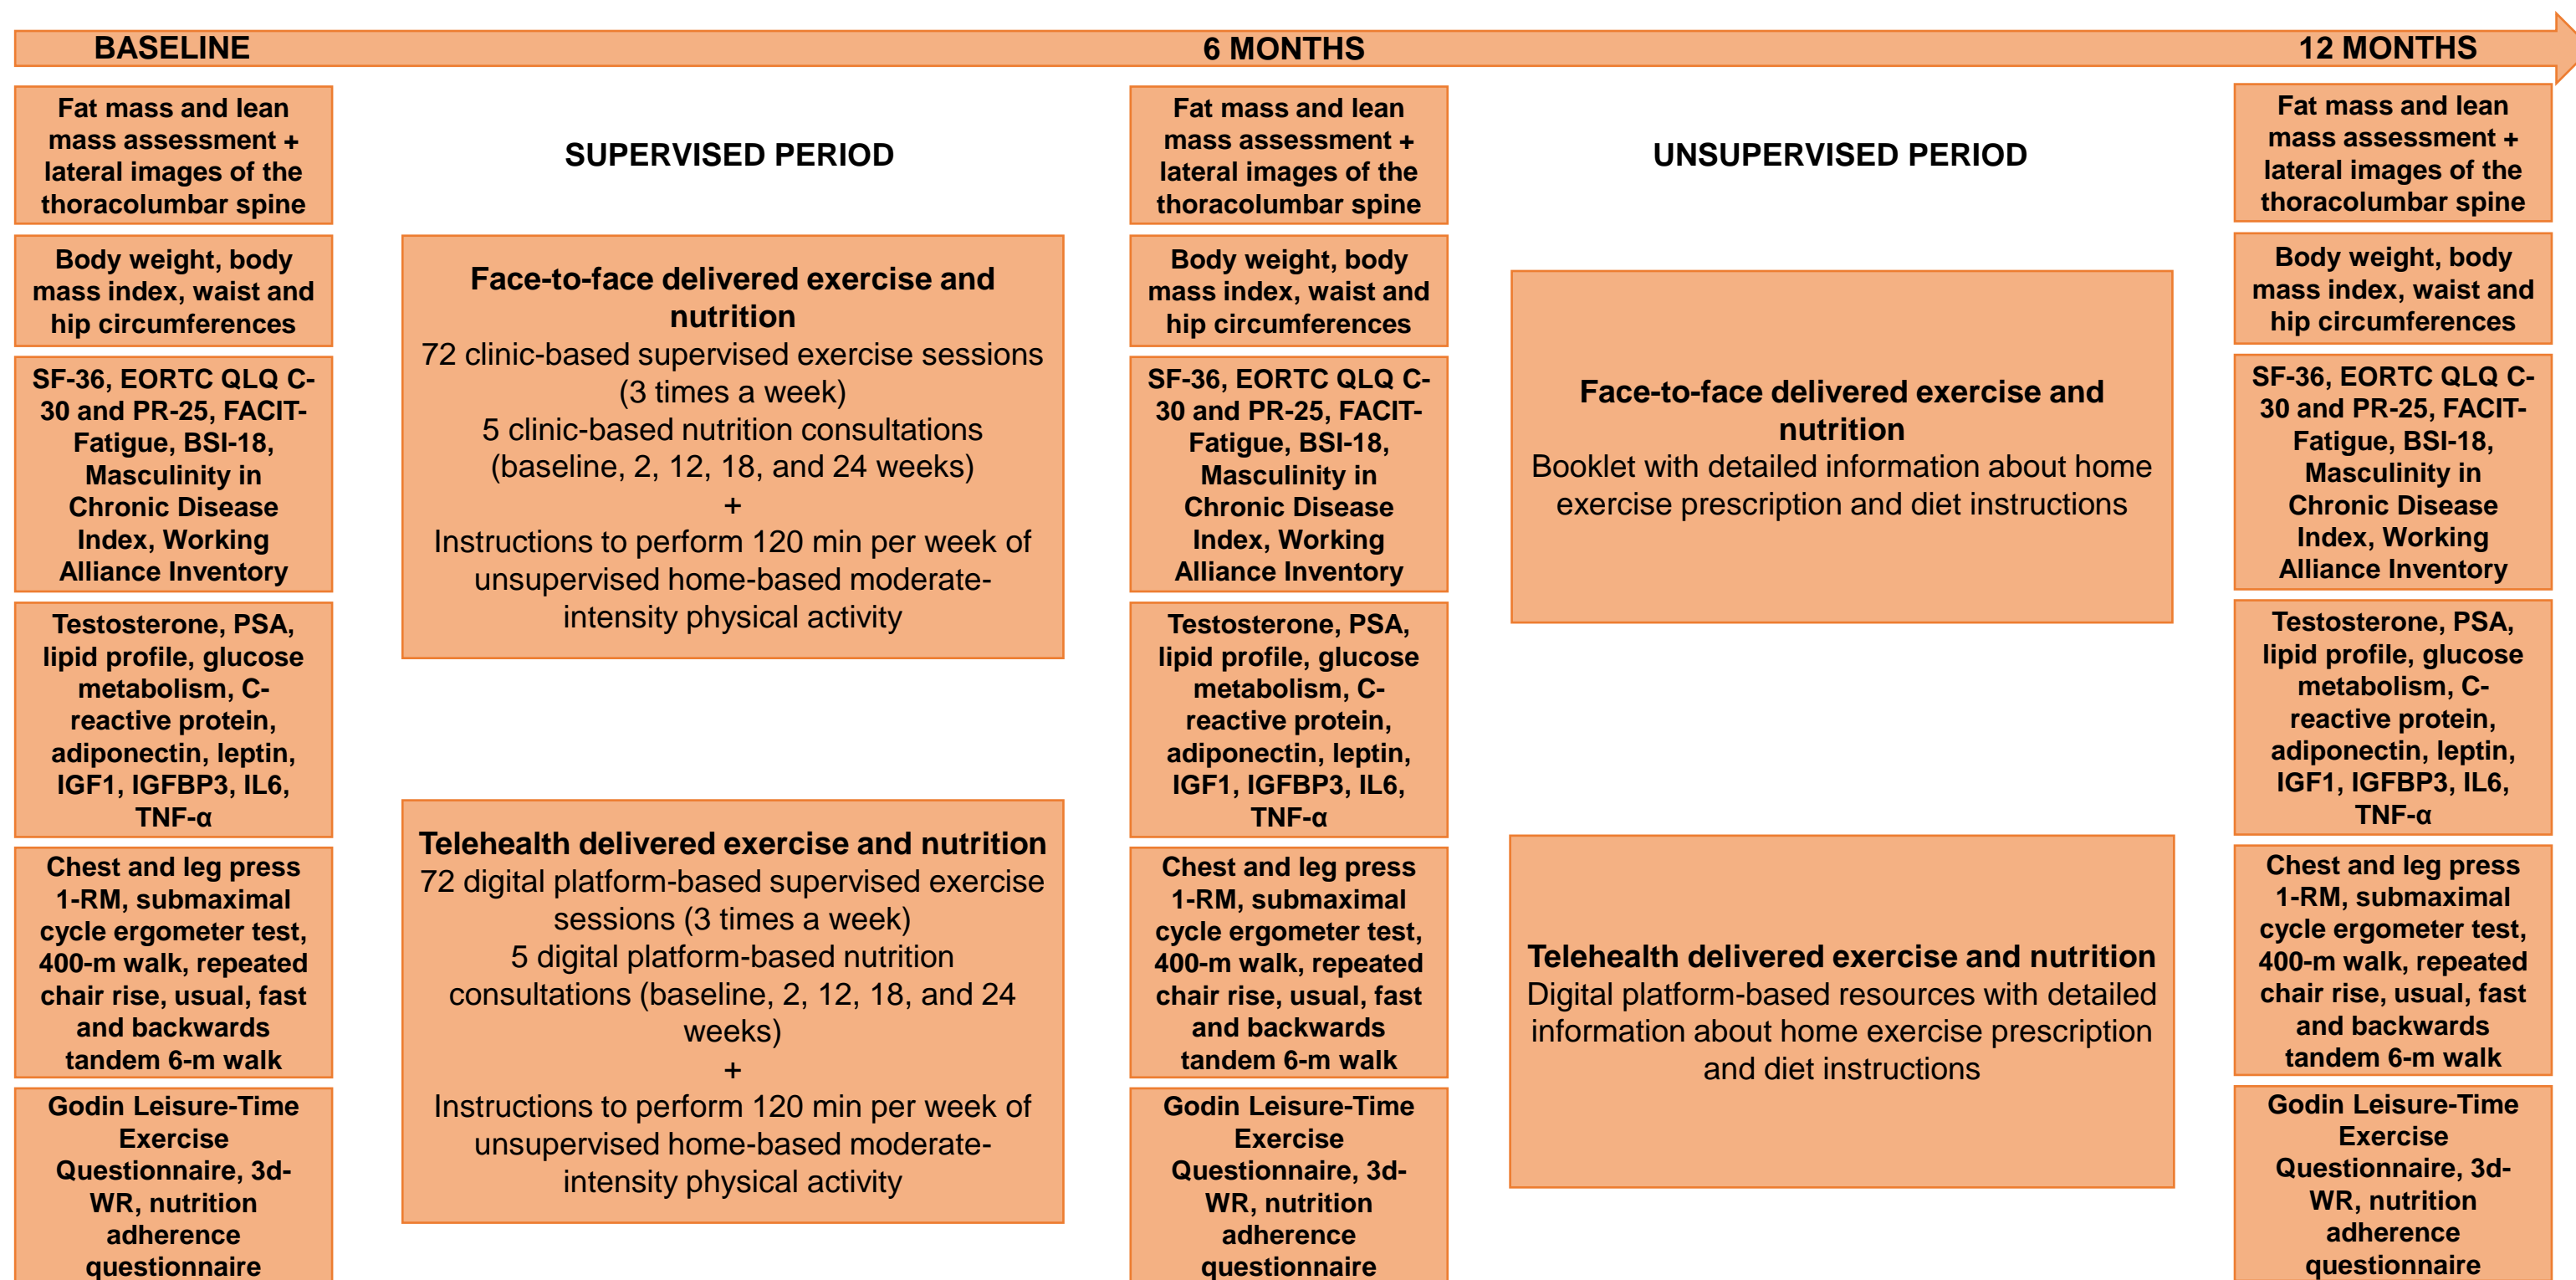

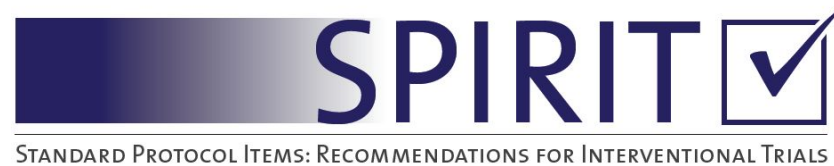

SPIRIT 2013 Checklist: Recommended items to address in a clinical trial protocol and related documents\*

| Section/item                      | Item No | Description                                                                                                                                                                                                                                                                              | Addressed on page number |
|-----------------------------------|---------|------------------------------------------------------------------------------------------------------------------------------------------------------------------------------------------------------------------------------------------------------------------------------------------|--------------------------|
| <b>Administrative information</b> |         |                                                                                                                                                                                                                                                                                          |                          |
| Title                             | 1       | Descriptive title identifying the study design, population, interventions, and, if applicable, trial acronym                                                                                                                                                                             | 1                        |
| Trial registration                | 2a      | Trial identifier and registry name. If not yet registered, name of intended registry                                                                                                                                                                                                     | 2 and 3                  |
|                                   | 2b      | All items from the World Health Organization Trial Registration Data Set                                                                                                                                                                                                                 | N/A                      |
| Protocol version                  | 3       | Date and version identifier                                                                                                                                                                                                                                                              | N/A                      |
| Funding                           | 4       | Sources and types of financial, material, and other support                                                                                                                                                                                                                              | 22                       |
| Roles and responsibilities        | 5a      | Names, affiliations, and roles of protocol contributors                                                                                                                                                                                                                                  | 1 and 22                 |
|                                   | 5b      | Name and contact information for the trial sponsor                                                                                                                                                                                                                                       | N/A                      |
|                                   | 5c      | Role of study sponsor and funders, if any, in study design; collection, management, analysis, and interpretation of data; writing of the report; and the decision to submit the report for publication, including whether they will have ultimate authority over any of these activities | N/A                      |
|                                   | 5d      | Composition, roles, and responsibilities of the coordinating centre, steering committee, endpoint adjudication committee, data management team, and other individuals or groups overseeing the trial, if applicable (see Item 21a for data monitoring committee)                         | N/A                      |

|    |                                                           |     |                                                                                                               |                |
|----|-----------------------------------------------------------|-----|---------------------------------------------------------------------------------------------------------------|----------------|
| 1  | <b>Introduction</b>                                       |     |                                                                                                               |                |
| 2  |                                                           |     |                                                                                                               |                |
| 3  | Background and                                            | 6a  | Description of research question and justification for undertaking the trial, including summary of relevant   | 6-7            |
| 4  | rationale                                                 |     | studies (published and unpublished) examining benefits and harms for each intervention                        |                |
| 5  |                                                           |     |                                                                                                               |                |
| 6  |                                                           | 6b  | Explanation for choice of comparators                                                                         | 6-7            |
| 7  |                                                           |     |                                                                                                               |                |
| 8  | Objectives                                                | 7   | Specific objectives or hypotheses                                                                             | 6-7            |
| 9  |                                                           |     |                                                                                                               |                |
| 10 | Trial design                                              | 8   | Description of trial design including type of trial (eg, parallel group, crossover, factorial, single group), |                |
| 11 |                                                           |     | allocation ratio, and framework (eg, superiority, equivalence, noninferiority, exploratory)                   | 7              |
| 12 |                                                           |     |                                                                                                               |                |
| 13 |                                                           |     |                                                                                                               |                |
| 14 | <b>Methods: Participants, interventions, and outcomes</b> |     |                                                                                                               |                |
| 15 |                                                           |     |                                                                                                               |                |
| 16 | Study setting                                             | 9   | Description of study settings (eg, community clinic, academic hospital) and list of countries where data will | 7-8            |
| 17 |                                                           |     | be collected. Reference to where list of study sites can be obtained                                          |                |
| 18 |                                                           |     |                                                                                                               |                |
| 19 | Eligibility criteria                                      | 10  | Inclusion and exclusion criteria for participants. If applicable, eligibility criteria for study centres and  | 7-8            |
| 20 |                                                           |     | individuals who will perform the interventions (eg, surgeons, psychotherapists)                               |                |
| 21 |                                                           |     |                                                                                                               |                |
| 22 | Interventions                                             | 11a | Interventions for each group with sufficient detail to allow replication, including how and when they will be | 12-13          |
| 23 |                                                           |     | administered                                                                                                  |                |
| 24 |                                                           |     |                                                                                                               |                |
| 25 |                                                           | 11b | Criteria for discontinuing or modifying allocated interventions for a given trial participant (eg, drug dose  | N/A            |
| 26 |                                                           |     | change in response to harms, participant request, or improving/worsening disease)                             |                |
| 27 |                                                           |     |                                                                                                               |                |
| 28 |                                                           | 11c | Strategies to improve adherence to intervention protocols, and any procedures for monitoring adherence        | 10-11          |
| 29 |                                                           |     | (eg, drug tablet return, laboratory tests)                                                                    |                |
| 30 |                                                           |     |                                                                                                               |                |
| 31 |                                                           | 11d | Relevant concomitant care and interventions that are permitted or prohibited during the trial                 | N/A            |
| 32 |                                                           |     |                                                                                                               |                |
| 33 | Outcomes                                                  | 12  | Primary, secondary, and other outcomes, including the specific measurement variable (eg, systolic blood       |                |
| 34 |                                                           |     | pressure), analysis metric (eg, change from baseline, final value, time to event), method of aggregation (eg, | 9-12           |
| 35 |                                                           |     | median, proportion), and time point for each outcome. Explanation of the clinical relevance of chosen         |                |
| 36 |                                                           |     | efficacy and harm outcomes is strongly recommended                                                            |                |
| 37 |                                                           |     |                                                                                                               |                |
| 38 | Participant timeline                                      | 13  | Time schedule of enrolment, interventions (including any run-ins and washouts), assessments, and visits for   | 9 and Figure 2 |
| 39 |                                                           |     | participants. A schematic diagram is highly recommended (see Figure)                                          |                |
| 40 |                                                           |     |                                                                                                               |                |
| 41 |                                                           |     |                                                                                                               |                |
| 42 |                                                           |     |                                                                                                               |                |
| 43 |                                                           |     |                                                                                                               |                |
| 44 |                                                           |     |                                                                                                               |                |
| 45 |                                                           |     |                                                                                                               |                |
| 46 |                                                           |     |                                                                                                               |                |

|   |             |    |                                                                                                                                                                                       |       |
|---|-------------|----|---------------------------------------------------------------------------------------------------------------------------------------------------------------------------------------|-------|
| 1 | Sample size | 14 | Estimated number of participants needed to achieve study objectives and how it was determined, including clinical and statistical assumptions supporting any sample size calculations | 13-14 |
| 2 |             |    |                                                                                                                                                                                       |       |
| 3 |             |    |                                                                                                                                                                                       |       |
| 4 | Recruitment | 15 | Strategies for achieving adequate participant enrolment to reach target sample size                                                                                                   | 7-8   |
| 5 |             |    |                                                                                                                                                                                       |       |

### 6 **Methods: Assignment of interventions (for controlled trials)**

#### 7 Allocation:

|    |                    |     |                                                                                                                                                                                                                                                                                                                                                          |         |
|----|--------------------|-----|----------------------------------------------------------------------------------------------------------------------------------------------------------------------------------------------------------------------------------------------------------------------------------------------------------------------------------------------------------|---------|
| 8  |                    |     |                                                                                                                                                                                                                                                                                                                                                          |         |
| 9  |                    |     |                                                                                                                                                                                                                                                                                                                                                          |         |
| 10 | Sequence           | 16a | Method of generating the allocation sequence (eg, computer-generated random numbers), and list of any factors for stratification. To reduce predictability of a random sequence, details of any planned restriction (eg, blocking) should be provided in a separate document that is unavailable to those who enrol participants or assign interventions | 9       |
| 11 | generation         |     |                                                                                                                                                                                                                                                                                                                                                          |         |
| 12 |                    |     |                                                                                                                                                                                                                                                                                                                                                          |         |
| 13 |                    |     |                                                                                                                                                                                                                                                                                                                                                          |         |
| 14 |                    |     |                                                                                                                                                                                                                                                                                                                                                          |         |
| 15 |                    |     |                                                                                                                                                                                                                                                                                                                                                          |         |
| 16 | Allocation         | 16b | Mechanism of implementing the allocation sequence (eg, central telephone; sequentially numbered, opaque, sealed envelopes), describing any steps to conceal the sequence until interventions are assigned                                                                                                                                                | 9       |
| 17 | concealment        |     |                                                                                                                                                                                                                                                                                                                                                          |         |
| 18 | mechanism          |     |                                                                                                                                                                                                                                                                                                                                                          |         |
| 19 |                    |     |                                                                                                                                                                                                                                                                                                                                                          |         |
| 20 | Implementation     | 16c | Who will generate the allocation sequence, who will enrol participants, and who will assign participants to interventions                                                                                                                                                                                                                                | 9       |
| 21 |                    |     |                                                                                                                                                                                                                                                                                                                                                          |         |
| 22 |                    |     |                                                                                                                                                                                                                                                                                                                                                          |         |
| 23 |                    |     |                                                                                                                                                                                                                                                                                                                                                          |         |
| 24 | Blinding (masking) | 17a | Who will be blinded after assignment to interventions (eg, trial participants, care providers, outcome assessors, data analysts), and how                                                                                                                                                                                                                | 7 and 9 |
| 25 |                    |     |                                                                                                                                                                                                                                                                                                                                                          |         |
| 26 |                    |     |                                                                                                                                                                                                                                                                                                                                                          |         |
| 27 |                    | 17b | If blinded, circumstances under which unblinding is permissible, and procedure for revealing a participant's allocated intervention during the trial                                                                                                                                                                                                     | N/A     |
| 28 |                    |     |                                                                                                                                                                                                                                                                                                                                                          |         |
| 29 |                    |     |                                                                                                                                                                                                                                                                                                                                                          |         |
| 30 |                    |     |                                                                                                                                                                                                                                                                                                                                                          |         |

### 31 **Methods: Data collection, management, and analysis**

|    |                 |     |                                                                                                                                                                                                                                                                                                                                                                                                              |      |
|----|-----------------|-----|--------------------------------------------------------------------------------------------------------------------------------------------------------------------------------------------------------------------------------------------------------------------------------------------------------------------------------------------------------------------------------------------------------------|------|
| 32 |                 |     |                                                                                                                                                                                                                                                                                                                                                                                                              |      |
| 33 | Data collection | 18a | Plans for assessment and collection of outcome, baseline, and other trial data, including any related processes to promote data quality (eg, duplicate measurements, training of assessors) and a description of study instruments (eg, questionnaires, laboratory tests) along with their reliability and validity, if known. Reference to where data collection forms can be found, if not in the protocol | 9-12 |
| 34 | methods         |     |                                                                                                                                                                                                                                                                                                                                                                                                              |      |
| 35 |                 |     |                                                                                                                                                                                                                                                                                                                                                                                                              |      |
| 36 |                 |     |                                                                                                                                                                                                                                                                                                                                                                                                              |      |
| 37 |                 |     |                                                                                                                                                                                                                                                                                                                                                                                                              |      |
| 38 |                 |     |                                                                                                                                                                                                                                                                                                                                                                                                              |      |
| 39 |                 | 18b | Plans to promote participant retention and complete follow-up, including list of any outcome data to be collected for participants who discontinue or deviate from intervention protocols                                                                                                                                                                                                                    | 9-12 |
| 40 |                 |     |                                                                                                                                                                                                                                                                                                                                                                                                              |      |
| 41 |                 |     |                                                                                                                                                                                                                                                                                                                                                                                                              |      |
| 42 |                 |     |                                                                                                                                                                                                                                                                                                                                                                                                              |      |

|    |                                 |     |                                                                                                                                                                                                                                                                                                                                       |       |
|----|---------------------------------|-----|---------------------------------------------------------------------------------------------------------------------------------------------------------------------------------------------------------------------------------------------------------------------------------------------------------------------------------------|-------|
| 1  | Data management                 | 19  | Plans for data entry, coding, security, and storage, including any related processes to promote data quality (eg, double data entry; range checks for data values). Reference to where details of data management procedures can be found, if not in the protocol                                                                     | N/A   |
| 2  |                                 |     |                                                                                                                                                                                                                                                                                                                                       |       |
| 3  |                                 |     |                                                                                                                                                                                                                                                                                                                                       |       |
| 4  |                                 |     |                                                                                                                                                                                                                                                                                                                                       |       |
| 5  | Statistical methods             | 20a | Statistical methods for analysing primary and secondary outcomes. Reference to where other details of the statistical analysis plan can be found, if not in the protocol                                                                                                                                                              | 13-14 |
| 6  |                                 |     |                                                                                                                                                                                                                                                                                                                                       |       |
| 7  |                                 |     |                                                                                                                                                                                                                                                                                                                                       |       |
| 8  |                                 | 20b | Methods for any additional analyses (eg, subgroup and adjusted analyses)                                                                                                                                                                                                                                                              | 13-14 |
| 9  |                                 |     |                                                                                                                                                                                                                                                                                                                                       |       |
| 10 |                                 | 20c | Definition of analysis population relating to protocol non-adherence (eg, as randomised analysis), and any statistical methods to handle missing data (eg, multiple imputation)                                                                                                                                                       | 13-14 |
| 11 |                                 |     |                                                                                                                                                                                                                                                                                                                                       |       |
| 12 |                                 |     |                                                                                                                                                                                                                                                                                                                                       |       |
| 13 |                                 |     |                                                                                                                                                                                                                                                                                                                                       |       |
| 14 | <b>Methods: Monitoring</b>      |     |                                                                                                                                                                                                                                                                                                                                       |       |
| 15 |                                 |     |                                                                                                                                                                                                                                                                                                                                       |       |
| 16 | Data monitoring                 | 21a | Composition of data monitoring committee (DMC); summary of its role and reporting structure; statement of whether it is independent from the sponsor and competing interests; and reference to where further details about its charter can be found, if not in the protocol. Alternatively, an explanation of why a DMC is not needed | N/A   |
| 17 |                                 |     |                                                                                                                                                                                                                                                                                                                                       |       |
| 18 |                                 |     |                                                                                                                                                                                                                                                                                                                                       |       |
| 19 |                                 |     |                                                                                                                                                                                                                                                                                                                                       |       |
| 20 |                                 |     |                                                                                                                                                                                                                                                                                                                                       |       |
| 21 |                                 |     |                                                                                                                                                                                                                                                                                                                                       |       |
| 22 |                                 | 21b | Description of any interim analyses and stopping guidelines, including who will have access to these interim results and make the final decision to terminate the trial                                                                                                                                                               | N/A   |
| 23 |                                 |     |                                                                                                                                                                                                                                                                                                                                       |       |
| 24 |                                 |     |                                                                                                                                                                                                                                                                                                                                       |       |
| 25 | Harms                           | 22  | Plans for collecting, assessing, reporting, and managing solicited and spontaneously reported adverse events and other unintended effects of trial interventions or trial conduct                                                                                                                                                     | 12-13 |
| 26 |                                 |     |                                                                                                                                                                                                                                                                                                                                       |       |
| 27 |                                 |     |                                                                                                                                                                                                                                                                                                                                       |       |
| 28 | Auditing                        | 23  | Frequency and procedures for auditing trial conduct, if any, and whether the process will be independent from investigators and the sponsor                                                                                                                                                                                           | N/A   |
| 29 |                                 |     |                                                                                                                                                                                                                                                                                                                                       |       |
| 30 |                                 |     |                                                                                                                                                                                                                                                                                                                                       |       |
| 31 |                                 |     |                                                                                                                                                                                                                                                                                                                                       |       |
| 32 | <b>Ethics and dissemination</b> |     |                                                                                                                                                                                                                                                                                                                                       |       |
| 33 |                                 |     |                                                                                                                                                                                                                                                                                                                                       |       |
| 34 | Research ethics approval        | 24  | Plans for seeking research ethics committee/institutional review board (REC/IRB) approval                                                                                                                                                                                                                                             | 7     |
| 35 |                                 |     |                                                                                                                                                                                                                                                                                                                                       |       |
| 36 |                                 |     |                                                                                                                                                                                                                                                                                                                                       |       |
| 37 | Protocol amendments             | 25  | Plans for communicating important protocol modifications (eg, changes to eligibility criteria, outcomes, analyses) to relevant parties (eg, investigators, REC/IRBs, trial participants, trial registries, journals, regulators)                                                                                                      | N/A   |
| 38 |                                 |     |                                                                                                                                                                                                                                                                                                                                       |       |
| 39 |                                 |     |                                                                                                                                                                                                                                                                                                                                       |       |
| 40 |                                 |     |                                                                                                                                                                                                                                                                                                                                       |       |
| 41 |                                 |     |                                                                                                                                                                                                                                                                                                                                       |       |
| 42 |                                 |     |                                                                                                                                                                                                                                                                                                                                       |       |
| 43 |                                 |     |                                                                                                                                                                                                                                                                                                                                       |       |
| 44 |                                 |     |                                                                                                                                                                                                                                                                                                                                       |       |
| 45 |                                 |     |                                                                                                                                                                                                                                                                                                                                       |       |
| 46 |                                 |     |                                                                                                                                                                                                                                                                                                                                       |       |

|    |                               |     |                                                                                                                                                                                                                                                                                     |          |
|----|-------------------------------|-----|-------------------------------------------------------------------------------------------------------------------------------------------------------------------------------------------------------------------------------------------------------------------------------------|----------|
| 1  | Consent or assent             | 26a | Who will obtain informed consent or assent from potential trial participants or authorised surrogates, and how (see Item 32)                                                                                                                                                        | 7-8      |
| 2  |                               |     |                                                                                                                                                                                                                                                                                     |          |
| 3  |                               |     |                                                                                                                                                                                                                                                                                     |          |
| 4  |                               | 26b | Additional consent provisions for collection and use of participant data and biological specimens in ancillary studies, if applicable                                                                                                                                               | N/A      |
| 5  |                               |     |                                                                                                                                                                                                                                                                                     |          |
| 6  |                               |     |                                                                                                                                                                                                                                                                                     |          |
| 7  | Confidentiality               | 27  | How personal information about potential and enrolled participants will be collected, shared, and maintained in order to protect confidentiality before, during, and after the trial                                                                                                | 7-8      |
| 8  |                               |     |                                                                                                                                                                                                                                                                                     |          |
| 9  |                               |     |                                                                                                                                                                                                                                                                                     |          |
| 10 | Declaration of interests      | 28  | Financial and other competing interests for principal investigators for the overall trial and each study site                                                                                                                                                                       | 22       |
| 11 |                               |     |                                                                                                                                                                                                                                                                                     |          |
| 12 |                               |     |                                                                                                                                                                                                                                                                                     |          |
| 13 | Access to data                | 29  | Statement of who will have access to the final trial dataset, and disclosure of contractual agreements that limit such access for investigators                                                                                                                                     | 7-8      |
| 14 |                               |     |                                                                                                                                                                                                                                                                                     |          |
| 15 |                               |     |                                                                                                                                                                                                                                                                                     |          |
| 16 | Ancillary and post-trial care | 30  | Provisions, if any, for ancillary and post-trial care, and for compensation to those who suffer harm from trial participation                                                                                                                                                       | N/A      |
| 17 |                               |     |                                                                                                                                                                                                                                                                                     |          |
| 18 |                               |     |                                                                                                                                                                                                                                                                                     |          |
| 19 |                               |     |                                                                                                                                                                                                                                                                                     |          |
| 20 | Dissemination policy          | 31a | Plans for investigators and sponsor to communicate trial results to participants, healthcare professionals, the public, and other relevant groups (eg, via publication, reporting in results databases, or other data sharing arrangements), including any publication restrictions | 4 and 14 |
| 21 |                               |     |                                                                                                                                                                                                                                                                                     |          |
| 22 |                               |     |                                                                                                                                                                                                                                                                                     |          |
| 23 |                               |     |                                                                                                                                                                                                                                                                                     |          |
| 24 |                               | 31b | Authorship eligibility guidelines and any intended use of professional writers                                                                                                                                                                                                      | N/A      |
| 25 |                               |     |                                                                                                                                                                                                                                                                                     |          |
| 26 |                               | 31c | Plans, if any, for granting public access to the full protocol, participant-level dataset, and statistical code                                                                                                                                                                     | N/A      |
| 27 |                               |     |                                                                                                                                                                                                                                                                                     |          |
| 28 |                               |     |                                                                                                                                                                                                                                                                                     |          |
| 29 | <b>Appendices</b>             |     |                                                                                                                                                                                                                                                                                     |          |
| 30 |                               |     |                                                                                                                                                                                                                                                                                     |          |
| 31 | Informed consent materials    | 32  | Model consent form and other related documentation given to participants and authorised surrogates                                                                                                                                                                                  | N/A      |
| 32 |                               |     |                                                                                                                                                                                                                                                                                     |          |
| 33 |                               |     |                                                                                                                                                                                                                                                                                     |          |
| 34 | Biological specimens          | 33  | Plans for collection, laboratory evaluation, and storage of biological specimens for genetic or molecular analysis in the current trial and for future use in ancillary studies, if applicable                                                                                      | N/A      |
| 35 |                               |     |                                                                                                                                                                                                                                                                                     |          |
| 36 |                               |     |                                                                                                                                                                                                                                                                                     |          |

\*It is strongly recommended that this checklist be read in conjunction with the SPIRIT 2013 Explanation & Elaboration for important clarification on the items. Amendments to the protocol should be tracked and dated. The SPIRIT checklist is copyrighted by the SPIRIT Group under the Creative Commons [“Attribution-NonCommercial-NoDerivs 3.0 Unported”](https://creativecommons.org/licenses/by-nc-nd/3.0/) license.



# BMJ Open

## Weight loss for overweight and obese prostate cancer patients: a study protocol of a randomised trial comparing clinic-based versus telehealth delivered exercise and nutrition intervention (The TeLEX trial)

|                                 |                                                                                                                                                                                                                                                                                                                                                                                                                                                                                                                                                                                                                                                                                                                                                                                                                                                                                                                                                                                                                                                                                     |
|---------------------------------|-------------------------------------------------------------------------------------------------------------------------------------------------------------------------------------------------------------------------------------------------------------------------------------------------------------------------------------------------------------------------------------------------------------------------------------------------------------------------------------------------------------------------------------------------------------------------------------------------------------------------------------------------------------------------------------------------------------------------------------------------------------------------------------------------------------------------------------------------------------------------------------------------------------------------------------------------------------------------------------------------------------------------------------------------------------------------------------|
| Journal:                        | <i>BMJ Open</i>                                                                                                                                                                                                                                                                                                                                                                                                                                                                                                                                                                                                                                                                                                                                                                                                                                                                                                                                                                                                                                                                     |
| Manuscript ID                   | bmjopen-2021-058899.R1                                                                                                                                                                                                                                                                                                                                                                                                                                                                                                                                                                                                                                                                                                                                                                                                                                                                                                                                                                                                                                                              |
| Article Type:                   | Protocol                                                                                                                                                                                                                                                                                                                                                                                                                                                                                                                                                                                                                                                                                                                                                                                                                                                                                                                                                                                                                                                                            |
| Date Submitted by the Author:   | 30-Mar-2022                                                                                                                                                                                                                                                                                                                                                                                                                                                                                                                                                                                                                                                                                                                                                                                                                                                                                                                                                                                                                                                                         |
| Complete List of Authors:       | Galvão, Daniel; Edith Cowan University, Exercise Medicine Research Institute<br>Taaffe, Dennis; Edith Cowan University, Exercise Medicine Research Institute<br>Hayne, Dickon; The University of Western Australia, School of Surgery<br>Lopez, Pedro; Edith Cowan University, Exercise Medicine Research Institute<br>Lyons-Wall, P; Edith Cowan University, Exercise Medicine Research Institute<br>Tang, Colin; Sir Charles Gairdner Hospital, Department of Radiation Oncology<br>Chambers, Suzanne; University of Technology Sydney Faculty of Health<br>Devine, Amanda; Edith Cowan University, School of Medical and Health Sciences<br>Spry, Nigel; Edith Cowan University, Exercise Medicine Research Institute<br>Jeffery, Emily; Edith Cowan University, Exercise Medicine Research Institute; Curtin University<br>Kudiarasu, Christine; Edith Cowan University, Exercise Medicine Research Institute<br>Joseph, David; Sir Charles Gairdner Hospital, Department of Radiation Oncology<br>Newton, Robert; Edith Cowan University, Exercise Medicine Research Institute |
| <b>Primary Subject Heading</b>: | Urology                                                                                                                                                                                                                                                                                                                                                                                                                                                                                                                                                                                                                                                                                                                                                                                                                                                                                                                                                                                                                                                                             |
| Secondary Subject Heading:      | Oncology                                                                                                                                                                                                                                                                                                                                                                                                                                                                                                                                                                                                                                                                                                                                                                                                                                                                                                                                                                                                                                                                            |
| Keywords:                       | Prostate disease < UROLOGY, Adult oncology < ONCOLOGY, Nutritional support < ONCOLOGY                                                                                                                                                                                                                                                                                                                                                                                                                                                                                                                                                                                                                                                                                                                                                                                                                                                                                                                                                                                               |
|                                 |                                                                                                                                                                                                                                                                                                                                                                                                                                                                                                                                                                                                                                                                                                                                                                                                                                                                                                                                                                                                                                                                                     |

1  
2  
3  
4  
5  
6  
7  
8  
9  
10  
11  
12  
13  
14  
15  
16  
17  
18  
19  
20  
21  
22  
23  
24  
25  
26  
27  
28  
29  
30  
31  
32  
33  
34  
35  
36  
37  
38  
39  
40  
41  
42  
43  
44  
45  
46  
47  
48  
49  
50  
51  
52  
53  
54  
55  
56  
57  
58  
59  
60

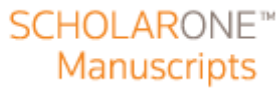

1  
2  
3 **Weight loss for overweight and obese prostate cancer patients: a study protocol of a**  
4 **randomised trial comparing clinic-based versus telehealth delivered exercise and**  
5 **nutrition intervention (The TeLEX trial)**  
6  
7  
8  
9  
10  
11  
12  
13  
14

15 Daniel A. Galvão<sup>1,2</sup>, Dennis R. Taaffe<sup>1,2</sup>, Dickon Hayne<sup>3,4</sup>, Pedro Lopez<sup>1,2</sup>,  
16  
17 Philippa Lyons-Wall<sup>1,2</sup>, Colin Tang<sup>1,5</sup>, Suzanne K. Chambers<sup>1,6</sup>, Amanda Devine<sup>2,7</sup>,  
18  
19 Nigel Spry<sup>2</sup>, Emily Jeffery<sup>1,8</sup>, Christine Kudiarasu<sup>1,2</sup>, David Joseph<sup>1,5</sup>, Robert U. Newton<sup>1,2</sup>  
20  
21  
22  
23  
24  
25

26 <sup>1</sup>Exercise Medicine Research Institute, Edith Cowan University, Joondalup, WA, Australia;

27  
28 <sup>2</sup>School of Medical and Health Sciences, Edith Cowan University, Joondalup, WA, Australia;

29  
30 <sup>3</sup>Medical School, Surgery, University of Western Australia, Perth, Western Australia,

31  
32  
33 Australia; <sup>4</sup>Urology Department, Fiona Stanley Hospital, Murdoch, Western Australia,

34  
35  
36 Australia; <sup>5</sup>Department of Radiation Oncology, Sir Charles Gairdner Hospital, Nedlands,  
37  
38 WA, Australia; <sup>6</sup>Faculty of Health Sciences, Australian Catholic University, Brisbane, QLD,

39  
40 Australia; <sup>7</sup>Institute for Nutrition Research, Edith Cowan University, Joondalup, WA,

41  
42  
43 Australia; <sup>8</sup>School of Public Health, Curtin University, Perth, Western Australia, Australia.  
44  
45  
46  
47  
48  
49  
50  
51  
52  
53  
54  
55  
56  
57  
58  
59  
60

1  
2  
3 **Address for correspondence and reprint requests to:**  
4

5 Professor Daniel A. Galvão, PhD, FACSM  
6

7 Exercise Medicine Research Institute  
8

9 Edith Cowan University, 270 Joondalup Drive Joondalup  
10

11 Western Australia 6027, Australia  
12

13  
14 Ph: 61-8-6304 3420  
15

16  
17 E-mail: d.galvao@ecu.edu.au  
18  
19  
20  
21  
22  
23  
24  
25  
26  
27  
28  
29  
30  
31  
32  
33  
34  
35  
36  
37  
38  
39  
40  
41  
42  
43  
44  
45  
46  
47  
48  
49  
50  
51  
52  
53  
54  
55  
56  
57  
58  
59  
60

## ABSTRACT

**Introduction:** Obese men with prostate cancer have an increased risk for biochemical recurrence, metastatic disease, and mortality. For those undergoing androgen deprivation therapy (ADT), substantial increases in fat mass are observed in the first year of treatment. Recently, we showed that a targeted supervised clinic-based exercise and nutrition intervention can result in a substantial reduction in fat mass with muscle mass preserved in ADT-treated patients. However, the intervention needs to be accessible to all patients and not just those who can access a supervised clinic-based program. The purpose of this study is to evaluate the efficacy of telehealth delivered compared to supervised clinic-based delivered exercise and nutrition intervention in overweight/obese prostate cancer patients.

**Methods and analysis:** A single-blinded, two-arm parallel group non-inferiority randomised trial will be undertaken with 104 overweight/obese men with prostate cancer (body fat percentage  $\geq 25\%$ ) randomly allocated in a ratio of 1:1 to a telehealth delivered, virtual supervised, exercise and nutrition program or a clinic-based, face-to-face supervised exercise and nutrition program. Exercise will consist of supervised resistance and aerobic exercise performed thrice weekly plus additional self-directed aerobic exercise performed 4 days per week for the first 6 months. Thereafter, for months 7-12, the programs will be self-managed. The primary endpoint will be fat mass. Secondary endpoints include lean mass and abdominal aortic calcification, anthropometric measures and blood pressure assessment, objective measures of physical function and physical activity levels, patient-reported outcomes, and blood markers. Measurements will be undertaken at baseline, 6 months (postintervention), and at 12 months follow-up. Data will be analysed using an intention-to-treat and per protocol approaches.

1  
2  
3 **Ethics and dissemination:** Ethics has been obtained in the Edith Cowan University Human  
4  
5 Research Ethics Committee (ID: 2021-02157-GALVAO). Outcomes from the study will be  
6  
7 published in academic journals and presented in scientific and consumer meetings.  
8  
9

10 **Trial registration number:** ACTRN12621001312831  
11

12 **Key words:** Prostate cancer; Obesity; Exercise; Nutrition; Fat mass; Lean mass  
13  
14  
15  
16  
17  
18  
19  
20  
21  
22  
23  
24  
25  
26  
27  
28  
29  
30  
31  
32  
33  
34  
35  
36  
37  
38  
39  
40  
41  
42  
43  
44  
45  
46  
47  
48  
49  
50  
51  
52  
53  
54  
55  
56  
57  
58  
59  
60

For peer review only

## ARTICLE SUMMARY

### Strengths and limitations of this study

- Direct comparison between telehealth and clinic-based supervised exercise and nutrition program in obese/overweight men with prostate cancer.
- Year-long trial comprising 6 months direct intervention followed by 6 months self-management.
- Comprehensive assessment of objective and patient-reported outcomes including dual-energy X-ray absorptiometry for the primary outcome.
- The study is limited to patients previously treated or currently undergoing androgen deprivation therapy.

## INTRODUCTION

Prostate cancer is one of the most prevalent cancers worldwide accounting for ~1.4 million new cancer cases and more than 300,000 deaths in 2020 (1). Among the treatments available, androgen deprivation therapy (ADT) has been extensively used in the management of localised and advanced disease to delay cancer progression and improve survival (2). However, several adverse effects including increases in fat mass and reductions in muscle mass are common especially during the first year of ADT (3), increasing or aggravating obesity and metabolic syndrome (4). In turn, obesity increases the risk for complications during radical prostatectomy and radiation therapy (5, 6), as well as the risk for biochemical recurrence, metastatic disease and mortality (7-9).

We (10-17) and others (18-23) have shown that exercise can counteract several treatment-related toxicities such as reducing or mitigating fatigue, improving muscle mass and strength, bone mass, and physical function during or following ADT. However, the effects of exercise alone on fat mass are modest with reductions of ~0.7 kg observed in a recent meta-analysis of overweight men with prostate cancer (17) compared to the substantial gains of ~2.3 kg that can be experienced during the first year of treatment (3). As a result, exercise undertaken in trials to date has been largely insufficient to counteract the treatment-related gains in fat mass, which may be especially problematic for men already overweight or obese.

Recently, we presented new evidence that in obese ADT-treated prostate cancer patients, a targeted and supervised clinic-based 12-week exercise program allied with protein supplementation and energy restriction resulted in a substantial reduction of ~2.8 kg in fat mass while preserving muscle mass (24). However, it is necessary to expand such programs to alternative exercise settings where overweight/obese patients living in under-served areas, such as those in regional and rural settings, or those without the financial capacity to access such programs. Recently, telehealth has emerged as a viable method to deliver health-related



1  
2  
3 services such as exercise and nutrition interventions (25), and if effective in this group of  
4  
5 prostate cancer patients, could be available at a lower cost and reach larger numbers of patients  
6  
7 irrespective of their geographical location. Therefore, we propose to undertake a 6-month non-  
8  
9 inferiority randomised trial to evaluate the efficacy of a telehealth delivered compared to a  
10  
11 supervised clinic-based delivered exercise and nutrition intervention in overweight and obese  
12  
13 prostate cancer patients. We will compare our previous reported supervised clinic-based  
14  
15 exercise and nutrition weight loss program (24) to a program modified for delivery via  
16  
17 telehealth in overweight/obese men with prostate cancer, with subsequent follow-up over 6  
18  
19 months to monitor sustainability. The primary outcome will be fat mass with secondary  
20  
21 outcomes including lean mass and objective and patient-reported outcomes.  
22  
23  
24  
25  
26  
27

## 28 **METHODS AND ANALYSIS**

29  
30 This is a single-blinded, two-arm parallel group non-inferiority randomised trial  
31  
32 designed to examine the efficacy of implementing a Telehealth delivered, virtual supervised,  
33  
34 Exercise and Nutrition (TENUT) program compared to a clinic-based, face-to-face supervised  
35  
36 Exercise and Nutrition (CENUT) program on fat mass in overweight/obese men with prostate  
37  
38 cancer (Figure 1). The protocol has been approved (ID: 2021-02157-GALVAO) by the Edith  
39  
40 Cowan University Human Research Ethics Committee. This trial expects to enrol participants  
41  
42 to baseline testing between December 2021 to December 2023.  
43  
44  
45  
46

### 47 **Patients and methods**

48  
49 One-hundred and four overweight/obese men (52 participants per arm) undergoing  
50  
51 treatment or previously treated (i.e., those who had completed treatment and are no longer on  
52  
53 treatment) for prostate cancer involving ADT will be identified and recruited through attending  
54  
55 physicians (general practitioner / radiation oncologist / urologist), specialist nurses,  
56  
57 advertisements in local newspapers and presentations at cancer support groups and related  
58  
59  
60

1  
2  
3 events in Western Australia. Inclusion criteria are: 1) body fat percentage  $\geq 25\%$ ,<sup>(26)</sup> and 2)  
4 ability to walk 400-m. Exclusion criteria are: 1) acute illness or any musculoskeletal,  
5 cardiovascular or neurological disorder that could inhibit exercise performance or put  
6 participants at risk from exercising, and 2) inability to read and understand English. Eligible  
7 patients will undertake baseline measurements prior to randomisation. All patients must  
8 provide written informed consent prior to participation in addition to a physician clearance  
9 form. The study coordinator will obtain the consent and clearance forms from patients and  
10 physicians. Patients with metastases will be required to present their last bone imaging scan to  
11 establish location and extent of bone lesions with the exercise prescription modified according  
12 to Galvão et al.<sup>(27)</sup> and to the Exercise and Sports Science Australia exercise and cancer  
13 position statement (28). All data relevant to the study will be kept on password-encrypted  
14 computers accessible only by study investigators situated in the Exercise Medicine Research  
15 Institute (Perth, WA, Australia).

### 32 **Patient and public involvement**

33  
34  
35 We conducted a health consumer workshop reaching out to 14 men with prostate cancer  
36 that had completed our most recent exercise and nutrition intervention study (24). The men  
37 were overweight or obese and completed the 3-month diet and exercise program in our exercise  
38 clinics. We sought their input on the program they had just completed and how they would  
39 view a telehealth intervention. This input was used to inform this project and ensure that it  
40 engages participants in a respectful, ethical, and impactful way. We also worked closely with  
41 the Prostate Cancer Foundation of Australia (PCFA), their support groups and state offices. As  
42 the project evolves, PCFA will assist in the dissemination of findings to cancer support groups  
43 and the general public, while study participants will receive their individual results as well as  
44 overall study findings.  
45  
46  
47  
48  
49  
50  
51  
52  
53  
54  
55  
56  
57  
58  
59  
60

## Randomisation

Patients will be randomly allocated by a computer random assignment program to the two study arms: 1) TENUT and 2) CENUT in a ratio of 1:1, subject to maintaining approximate balance regarding stratification for time on ADT (< 6 months, ≥ 6 months, and previous ADT). An investigator with no patient contact will be responsible for randomisation. The allocation sequence will be concealed from exercise physiologists involved in assigning participants to groups or conducting the study measures. In addition, participants will be requested to not reveal their group allocation to any members of the research team. The exercise will be provided by exercise physiologists not in the research team or performing the tests.

## Measurements

All measurement study endpoints will take place at baseline, 6 months (end of intervention) and 12 months (6 months post intervention) and will be undertaken in person at the Exercise Medicine Research Institute at Edith Cowan University in Perth, Australia (Figure 2). All assessment tools/procedures have established validity and reliability and are used widely in clinical research including by our team (10-15).

## Study endpoints

### Primary study endpoint

#### Fat mass

Regional and whole-body fat mass will be derived from a whole-body dual-energy X-ray absorptiometry (DXA; Horizon A, Hologic, Waltham, MA) scan. Trunk adiposity, visceral fat and adipose indices will be assessed using standard procedures (13, 14, 29).

## Secondary study endpoints

### Lean mass and abdominal aortic calcification

Regional and whole-body lean mass will be assessed by DXA. In addition, lateral spine images will be collected for abdominal aortic calcification assessment as a surrogate of cardiovascular disease (30).

### Anthropometric measures and blood pressure assessment

Central adiposity will be assessed by waist circumference (WC) and hip circumference (HC) (31). WC will be measured at the level of the narrowest point between the lower costal (rib) border and the iliac crest. HC will be measured at the level of the greatest posterior protuberance of the buttocks which usually corresponds anteriorly to the level of the symphysis pubis. Body mass index ( $\text{kg}/\text{m}^2$ ) will also be used to assess weight (kg) relative to height (m) squared. A validated oscillometric device (HEM-705CP, Omron Corporation, Japan) will be used to record brachial systolic and diastolic blood pressure at the dominant arm in triplicate.

### Objective measures of physical function and physical activity levels

A battery of standard tests will be used to assess physical function: 1) one-repetition maximum (1RM) test for chest press and leg press strength, 2) submaximal cycle ergometer test for estimation of maximal oxygen uptake ( $\text{VO}_2\text{max}$ ), 3) 400-m walk test for aerobic capacity and walking endurance, 4) repeated chair rise for lower body function, 5) 6-m usual and fast walk for gait speed, and 6) 6-m backwards tandem walk for dynamic balance (11-15, 32). Self-reported physical activity will be assessed by the leisure score index from the Godin Leisure-Time Exercise Questionnaire modified to include a question on resistance training (33).

## Intervention adherence and monitoring

Adherence to the direct supervised exercise component will be defined as the number of sessions attended divided by the total number of sessions scheduled in both TENUT (i.e., telehealth program) and CENUT (clinic-based program) groups. For the self-managed phase of the study, patients in the TENUT will continue with the digital platform for recording, while the CENUT group will receive a self-managed exercise log with instructions to be completed.

Adherence to dietary recommendations will be assessed using an adapted customised adherence questionnaire (24, 34, 35) designed to provide an estimated frequency of consumption and number of serves of food of interest based on the nutrition advice given. Food items of interest include fruit and vegetables, nuts, high protein foods, dairy, grains and cereals, beverages and alcoholic drinks, discretionary and take-away items. Patients will be asked 25 yes/no questions where a score of 1 is given if the patient met a predetermined desired outcome, or a 0 if they didn't. A higher total score indicates greater compliance with a maximum score of 25. For nutrition monitoring, patients will complete a 3-day weighed food record (3d-WR) over 3 consecutive days (1 weekend day and 2 weekdays) at baseline, 6 and 12 months. This will provide an estimate of total energy intake ( $\text{kJ}\cdot\text{d}^{-1}$ ) and macro- and micronutrients consumed. The 3d-WR data will be analysed using FoodWorks (FoodWorks 10 Professional, Xyris Software Pty Ltd, QLD, Australia).

## Patient-reported outcomes

Health-related quality of life will be assessed using the Medical Outcomes Short Form 36 (SF-36v2) (36), while cancer-related quality of life will be measured using the EORTC QLQ-C30 (37) and the EORTC-PR25 for disease-specific health-related quality of life (38). Fatigue will be assessed using the Functional assessment of Chronic Illness Therapy-Fatigue (FACIT-Fatigue) questionnaire. The Brief Symptom Inventory-18 (BSI-18) will be used to assess psychological distress across the domains of anxiety, depression and somatisation, and

1  
2  
3 global distress severity (39). These validated instruments are an integrated system to assess  
4 quality of life and psychological distress in cancer patients and has been extensively employed  
5 in clinical trials of exercise medicine (10-13, 40). In addition, the Masculinity in Chronic  
6 Disease Index will be used to assess the extent to which men identify with six masculine values:  
7 strength; sexual importance/priority; family responsibilities; emotional self-reliance; optimistic  
8 capacity and action approach (41, 42), while an adapted Working Alliance Inventory for  
9 General Practice tool will be used to identify and explain the mechanism or process that  
10 underlies the delivery of exercise and nutrition as well as benefits derived from these programs  
11 in men with prostate cancer (43, 44).

### 23 **Blood markers**

24  
25  
26 Testosterone, prostate specific antigen (PSA), lipid profile, insulin, glucose, glycated  
27 haemoglobin (HbA<sub>1c</sub>), C-reactive protein, adiponectin, leptin, insulin-like-growth factor-1  
28 (IGF1), IGF-binding protein-3 (IGFBP3), interleukin 6 (IL6) and tumour necrosis factor (TNF-  
29  $\alpha$ ) will be measured commercially by an accredited Australian National Association of Testing  
30 Authorities (NATA) laboratory (Pathwest Diagnostics, Perth, Western Australia) (11, 13, 24).

### 37 **Safety and monitoring**

38  
39  
40 Patients will be monitored for any adverse events during training and testing by  
41 Accredited Exercise Physiologists (AEPs) with study clinicians overseeing aspects of patient  
42 management where required. During the self-management phase of the study, participants will  
43 record any adverse events which will be monitored by AEPs via monthly phone calls. The  
44 National Cancer Institute's Common Terminology Criteria for Adverse Events (CTCAE,  
45 V.5.0) will be used for grading the severity of adverse events during the study (45).

### 53 **Exercise interventions**

#### 56 **Telehealth and Face-To-Face delivered exercise and nutrition programs**

1  
2  
3 The interventions will consist of 300 min per week of moderate to vigorous exercise  
4 per week for 6 months comprising a supervised resistance and aerobic exercise program  
5 performed three times per week for 60 min per session delivered face-to-face in an exercise  
6 clinic or via telehealth by AEP, plus 30 min of moderate/vigorous physical activity self-  
7 managed 4 days per week. For both TENUT and CENUT, resistance training will comprise 2-4  
8 sets for 6-8 exercises targeting the major upper and lower body muscle groups performed using  
9 equipment such as exercise machines, dumbbells and elastic bands at an intensity of 6-12  
10 repetition maximum (RM; i.e. the maximal weight that can be lifted 6 to 12 times which is  
11 equivalent to ~60-85% of 1RM). The supervised aerobic exercise component will involve 15  
12 to 20 minutes of moderate to vigorous intensity cardiovascular exercise using a variety of  
13 modes such as walking, jogging or cycling. This approach has been extensively used by our  
14 team (11, 13, 14, 24), providing optimal stimulus while maximising safety, compliance and  
15 retention in clinic-based exercise programs. The self-directed aerobic component will comprise  
16 these modes for 30 minutes 4 days per week. For the telehealth intervention we will implement  
17 the latest digital platforms that we developed during COVID-19 restrictions in 2020 and related  
18 technological advancements in wearable sensors (Fitbit Charge 5 ®, Fitbit Inc, USA), online  
19 monitoring and video chat (Microsoft Teams, Microsoft, Redmond, WA, USA), cloud-based  
20 platforms (MyWellness TechnoGym Cloud platform, TechnoGym Australia Pty, Australia).  
21 Participants will receive their exercise program via their smart device or computer,  
22 communicate with the AEP and fellow participants by video chat, and be monitored in real-  
23 time through the internet.  
24  
25  
26  
27  
28  
29  
30  
31  
32  
33  
34  
35  
36  
37  
38  
39  
40  
41  
42  
43  
44  
45  
46  
47  
48  
49

50  
51 For the nutrition intervention, all participants will receive a total of 5 face-to-face or  
52 online consultations over the first 6 months of intervention (baseline, 2, 12, 18, 24 weeks) with  
53 an Accredited Practising Dietitian (APD) aiming to: 1) achieve an energy deficit of 2100-4200  
54 kJ/day (500-1000 kcal/day); 2) reducing discretionary items including alcoholic drinks and  
55  
56  
57  
58  
59  
60

1  
2  
3 foods containing refined sugars; and 3) maintain protein intake. In addition, participants will  
4  
5 consume 40 g of a whey protein supplement 3 times per week immediately after the resistance  
6  
7 exercise sessions.  
8  
9

10 At the end of the first 6-month period, participants from CENUT will receive a booklet  
11  
12 with detailed information about a home exercise prescription, while the telehealth program will  
13  
14 be maintained without supervision for participants from TENUT. Instructions on performing  
15  
16 the home-based exercises and achieving dietary recommendations will be provided by the AEP  
17  
18 and APD.  
19  
20  
21  
22  
23

### 24 **Calculation of sample size and statistical analysis**

25  
26 From our previous research in obese prostate cancer patients we reported that the  
27  
28 standard deviation for change in fat mass equates to 2.6 kg (mean change of -2.8 kg) following  
29  
30 3 months of combined resistance and aerobic exercise with protein supplementation and caloric  
31  
32 restriction (24). A priori, 43 patients per group will be required to achieve 80% power at an  $\alpha$   
33  
34 level of .025 (one-tailed) and demonstrate a non-inferiority limit below 1.4 kg of fat mass  
35  
36 between the TENUT and CENUT groups. Therefore, to adequately ensure that we have a  
37  
38 sufficient number of participants at the end of the study (accounting for a drop-out rate of 20%),  
39  
40 52 participants will be randomised to each group.  
41  
42  
43

44 Normality of the data will be assessed using the Kolmogorov-Smirnov test. Baseline  
45  
46 characteristics will be analysed using Student's t tests or the Mann-Whitney U-test for  
47  
48 continuous measures, as appropriate, and Chi-square for categorical variables. For the study  
49  
50 outcomes, data will be analysed using intention-to-treat and per protocol approaches. Testing  
51  
52 for longitudinal changes will be performed using linear mixed models (LMM). Non-inferiority  
53  
54 of the intervention for the primary outcome will be implied if the lower limit of a 1-sided 95%  
55  
56  
57  
58  
59  
60



1  
2  
3 confidence interval of the difference between groups between baseline and 6 months is within  
4  
5 the pre-stated limit of 1.4 kg for fat mass change.  
6  
7  
8  
9

## 10 11 12 **Ethics and dissemination**

13  
14 Outcomes from the study will be published in peer-reviewed academic journals and  
15 presented in scientific, consumer and clinical meetings. The study investigators and trial  
16 coordinator will have access to the data.  
17  
18  
19  
20  
21  
22

## 23 24 **DISCUSSION**

25  
26 Men with prostate cancer undergoing ADT experience increased fat and reduced  
27 muscle mass placing them at increased risk of morbidity and mortality from cardiovascular and  
28 metabolic diseases (3, 8, 46, 47). Targeted exercise medicine interventions for men with  
29 prostate cancer can improve quality of life, reduce treatment-related side-effects, and improve  
30 both physical and psychological health (10-17). More recently, we have shown that in obese  
31 men with prostate cancer, a targeted supervised clinic-based exercise and nutrition intervention  
32 resulted in a substantial reduction in fat mass (~3 kg) while muscle mass was preserved (24).  
33 This is a new finding, however, availability of these clinic-based services and patient support  
34 is limited and the vast majority of patients cannot access due to issues of distance, transport,  
35 inconvenience and financial capacity. The result is an unacceptable disparity between patients  
36 that have access to such supportive care and those that do not, resulting in suboptimal quality  
37 of life and ultimately survival for those men that cannot access current best practice care.  
38  
39  
40  
41  
42  
43  
44  
45  
46  
47  
48  
49  
50  
51  
52

53 These issues are particularly pertinent to patients in Western Australia due to our  
54 geography (comprises about a third of the country with only one major metropolitan area)  
55 resulting in the majority of men with prostate cancer having limited or no capacity to access  
56  
57  
58  
59  
60

1  
2  
3 exercise and nutrition programs face-to-face with health professionals. Access to the latest  
4  
5 exercise medicine and nutrition services has been unfortunately further impacted by the  
6  
7 COVID-19 pandemic due to personal isolation, physical distancing and changes to public  
8  
9 transport and procedures within cancer care clinics (48). Moreover, changes in physical activity  
10  
11 behaviour can be challenging in this group (49, 50), with common barriers being treatment-  
12  
13 related symptoms and lack of time (51). Therefore, telehealth exercise and nutrition  
14  
15 interventions have the potential to overcome a number of these issues providing high-quality,  
16  
17 effective and safe supportive care at a time and in a place of the patient's choosing. Translation  
18  
19 of the outcomes of this research can be immediate. The underlying knowledge required to take  
20  
21 this program out into the community will be a result of the research project.  
22  
23  
24  
25  
26  
27  
28  
29  
30  
31  
32  
33  
34  
35  
36  
37  
38  
39  
40  
41  
42  
43  
44  
45  
46  
47  
48  
49  
50  
51  
52  
53  
54  
55  
56  
57  
58  
59  
60

## REFERENCES

1. Sung H, Ferlay J, Siegel RL, Laversanne M, Soerjomataram I, Jemal A, et al. Global cancer statistics 2020: GLOBOCAN estimates of incidence and mortality worldwide for 36 cancers in 185 countries. *CA Cancer J Clin*. 2021.
2. D'Amico AV, Chen MH, Renshaw AA, Loffredo M, Kantoff PW. Androgen suppression and radiation vs radiation alone for prostate cancer: a randomized trial. *Jama*. 2008;299(3):289-95.
3. Galvao DA, Spry NA, Taaffe DR, Newton RU, Stanley J, Shannon T, et al. Changes in muscle, fat and bone mass after 36 weeks of maximal androgen blockade for prostate cancer. *BJU Int*. 2008;102(1):44-7.
4. Bhindi B, Locke J, Alibhai SMH, Kulkarni GS, Margel DS, Hamilton RJ, et al. Dissecting the association between metabolic syndrome and prostate cancer risk: analysis of a large clinical cohort. *Eur Urol*. 2015;67(1):64-70.
5. Di Bella CM, Howard LE, Oyekunle T, De Hoedt AM, Salama JK, Song H, et al. Abdominal and pelvic adipose tissue distribution and risk of prostate cancer recurrence after radiation therapy. *Prostate*. 2020;80(14):1244-52.
6. Uchida T, Higure T, Kawakami M, Nakano M, Nakajima N, Kim H, et al. What factors affect the operative time of robot-assisted laparoscopic radical prostatectomy? *Surg Endosc*. 2020; Online ahead of print.
7. Bonn SE, Wiklund F, Sjolander A, Szulkin R, Stattin P, Holmberg E, et al. Body mass index and weight change in men with prostate cancer: progression and mortality. *Cancer Causes Control*. 2014;25(8):933-43.
8. Cao Y, Ma J. Body mass index, prostate cancer-specific mortality, and biochemical recurrence: a systematic review and meta-analysis. *Cancer Prev Res (Phila)*. 2011;4(4):486-501.

- 1  
2  
3 9. Troeschel AN, Hartman TJ, Jacobs EJ, Stevens VL, Gansler T, Flanders WD, et al.  
4  
5 Postdiagnosis body mass index, weight change, and mortality from prostate cancer,  
6  
7 cardiovascular disease, and all causes among survivors of nonmetastatic prostate cancer. *J Clin*  
8  
9 *Oncol.* 2020;38(18):2018-27.  
10  
11
- 12 10. Galvao DA, Newton RU, Chambers SK, Spry N, Joseph D, Gardiner RA, et al.  
13  
14 Psychological distress in men with prostate cancer undertaking androgen deprivation therapy:  
15  
16 modifying effects of exercise from a year-long randomized controlled trial. *Prostate Cancer*  
17  
18 *Prostatic Dis.* 2021.  
19  
20
- 21 11. Galvao DA, Spry N, Denham J, Taaffe DR, Cormie P, Joseph D, et al. A multicentre  
22  
23 year-long randomised controlled trial of exercise training targeting physical functioning in men  
24  
25 with prostate cancer previously treated with androgen suppression and radiation from TROG  
26  
27 03.04 RADAR. *Eur Urol.* 2014;65(5):856-64.  
28  
29
- 30 12. Galvao DA, Taaffe DR, Spry N, Cormie P, Joseph D, Chambers SK, et al. Exercise  
31  
32 Preserves Physical Function in Prostate Cancer Patients with Bone Metastases. *Med Sci Sports*  
33  
34 *Exerc.* 2018;50(3):393-9.  
35  
36
- 37 13. Galvao DA, Taaffe DR, Spry N, Joseph D, Newton RU. Combined resistance and  
38  
39 aerobic exercise program reverses muscle loss in men undergoing androgen suppression  
40  
41 therapy for prostate cancer without bone metastases: a randomized controlled trial. *J Clin*  
42  
43 *Oncol.* 2010;28(2):340-7.  
44  
45
- 46 14. Newton RU, Galvao DA, Spry N, Joseph D, Chambers SK, Gardiner RA, et al. Exercise  
47  
48 Mode Specificity for Preserving Spine and Hip Bone Mineral Density in Prostate Cancer  
49  
50 Patients. *Med Sci Sports Exerc.* 2019;51(4):607-14.  
51  
52
- 53 15. Taaffe DR, Galvao DA, Spry N, Joseph D, Chambers SK, Gardiner RA, et al.  
54  
55 Immediate versus delayed exercise in men initiating androgen deprivation: effects on bone  
56  
57 density and soft tissue composition. *BJU Int.* 2019;123(2):261-9.  
58  
59  
60

- 1  
2  
3 16. Lopez P, Taaffe DR, Newton RU, Buffart LM, Galvao DA. What is the minimal dose  
4 for resistance exercise effectiveness in prostate cancer patients? Systematic review and meta-  
5 analysis on patient-reported outcomes. *Prostate Cancer Prostatic Dis.* 2020.  
6  
7  
8  
9  
10 17. Lopez P, Taaffe DR, Newton RU, Galvao DA. Resistance exercise dosage in men with  
11 prostate cancer: Systematic review, meta-analysis, and meta-regression. *Med Sci Sports Exerc.*  
12 2021;53(3):459-69.  
13  
14  
15  
16  
17 18. Bourke L, Gilbert S, Hooper R, Steed LA, Joshi M, Catto JW, et al. Lifestyle changes  
18 for improving disease-specific quality of life in sedentary men on long-term androgen-  
19 deprivation therapy for advanced prostate cancer: a randomised controlled trial. *Eur Urol.*  
20 2014;65(5):865-72.  
21  
22  
23  
24  
25  
26 19. Segal RJ, Reid RD, Courneya KS, Malone SC, Parliament MB, Scott CG, et al.  
27 Resistance exercise in men receiving androgen deprivation therapy for prostate cancer. *J Clin*  
28 *Oncol.* 2003;21(9):1653-9.  
29  
30  
31  
32  
33 20. Segal RJ, Reid RD, Courneya KS, Sigal RJ, Kenny GP, Prud'Homme DG, et al.  
34 Randomized controlled trial of resistance or aerobic exercise in men receiving radiation therapy  
35 for prostate cancer. *J Clin Oncol.* 2009;27(3):344-51.  
36  
37  
38  
39  
40 21. Ndjavera W, Orange ST, O'Doherty AF, Leicht AS, Rochester M, Mills R, et al.  
41 Exercise-induced attenuation of treatment side-effects in patients with newly diagnosed  
42 prostate cancer beginning androgen-deprivation therapy: a randomised controlled trial. *BJU*  
43 *Int.* 2020;125(1):28-37.  
44  
45  
46  
47  
48  
49 22. Winters-Stone KM, Dobek JC, Bennett JA, Maddalozzo GF, Ryan CW, Beer TM.  
50 Skeletal response to resistance and impact training in prostate cancer survivors. *Med Sci Sports*  
51 *Exerc.* 2014;46(8):1482-8.  
52  
53  
54  
55  
56  
57  
58  
59  
60

- 1  
2  
3 23. Bressi B, Cagliari M, Contesini M, Mazzini E, Bergamaschi FAM, Moscato A, et al.  
4  
5 Physical exercise for bone health in men with prostate cancer receiving androgen deprivation  
6  
7 therapy: a systematic review. *Support Care Cancer*. 2021;29(4):1811-24.  
8  
9  
10 24. Wilson RL, Newton RU, Taaffe DR, Hart NH, Lyons-Wall P, Galvao DA. Weight loss  
11  
12 for obese prostate cancer patients on androgen deprivation therapy. *Med Sci Sports Exerc*.  
13  
14 2021;53(3):470-8.  
15  
16  
17 25. Collins IM, Burbury K, Underhill CR. Teletrials: implementation of a new paradigm  
18  
19 for clinical trials. *Med J Aust*. 2020;213(6):263-5.e1.  
20  
21  
22 26. Kennedy AP, Shea JL, Sun G. Comparison of the classification of obesity by BMI vs.  
23  
24 dual-energy X-ray absorptiometry in the Newfoundland population. *Obesity (Silver Spring)*.  
25  
26 2009;17(11):2094-9.  
27  
28  
29 27. Galvao DA, Taaffe DR, Spry N, Cormie P, Joseph D, Chambers SK, et al. Exercise  
30  
31 Preserves Physical Function in Prostate Cancer Patients with Bone Metastases. *Med Sci Sport*  
32  
33 *Exer*. 2018;50(3):393-9.  
34  
35  
36 28. Hayes SC, Newton RU, Spence RR, Galvão DA. The Exercise and Sports Science  
37  
38 Australia position statement: Exercise medicine in cancer management. *J Sci Med Sport*.  
39  
40 2019;22(11):1175-99.  
41  
42  
43 29. Messina C, Albano D, Gitto S, Tofanelli L, Bazzocchi A, Ulivieri FM, et al. Body  
44  
45 composition with dual energy X-ray absorptiometry: from basics to new tools. *Quant Imaging*  
46  
47 *Med Surg*. 2020;10(8):1687-98.  
48  
49  
50 30. Lewis JR, Schousboe JT, Lim WH, Wong G, Wilson KE, Zhu K, et al. Long-Term  
51  
52 Atherosclerotic Vascular Disease Risk and Prognosis in Elderly Women With Abdominal  
53  
54 Aortic Calcification on Lateral Spine Images Captured During Bone Density Testing: A  
55  
56 Prospective Study. *J Bone Miner Res*. 2018;33(6):1001-10.  
57  
58  
59  
60

- 1  
2  
3 31. Evans DJ, Hoffmann RG, Kalkhoff RK, Kissebah AH. Relationship of androgenic  
4 activity to body fat topography, fat cell morphology, and metabolic aberrations in  
5 premenopausal women. *J Clin Endocrinol Metab.* 1983;57(2):304-10.  
6  
7  
8  
9  
10 32. Mijwel S, Cardinale D, Ekblom-Bak E, Sundberg CJ, Wengström Y, Rundqvist H.  
11 Validation of 2 Submaximal Cardiorespiratory Fitness Tests in Patients With Breast Cancer  
12 Undergoing Chemotherapy. *Rehabil Oncol.* 2016;34(4):137-43.  
13  
14  
15  
16  
17 33. Godin G, Shephard RJ. A simple method to assess exercise behavior in the community.  
18 *Can J Appl Sport Sci.* 1985;10(3):141-6.  
19  
20  
21 34. Martínez-González MA, García-Arellano A, Toledo E, Salas-Salvadó J, Buil-Cosiales  
22 P, Corella D, et al. A 14-item Mediterranean diet assessment tool and obesity indexes among  
23 high-risk subjects: the PREDIMED trial. *PLoS One.* 2012;7(8):e43134.  
24  
25  
26  
27  
28 35. Erdrich S, Bishop KS, Karunasinghe N, Han DY, Ferguson LR. A pilot study to  
29 investigate if New Zealand men with prostate cancer benefit from a Mediterranean-style diet.  
30 *PeerJ.* 2015;3:e1080.  
31  
32  
33  
34  
35 36. Ware JE, Jr., Sherbourne CD. The MOS 36-item short-form health survey (SF-36). I.  
36 Conceptual framework and item selection. *Med Care.* 1992;30(6):473-83.  
37  
38  
39  
40 37. Aaronson NK, Ahmedzai S, Bergman B, Bullinger M, Cull A, Duez NJ, et al. The  
41 European Organization for Research and Treatment of Cancer QLQ-C30: a quality-of-life  
42 instrument for use in international clinical trials in oncology. *J Natl Cancer Inst.*  
43 1993;85(5):365-76.  
44  
45  
46  
47  
48 38. Chu D, Popovic M, Chow E, Cella D, Beaumont JL, Lam H, et al. Development,  
49 characteristics and validity of the EORTC QLQ-PR25 and the FACT-P for assessment of  
50 quality of life in prostate cancer patients. *J Comp Eff Res.* 2014;3(5):523-31.  
51  
52  
53  
54  
55 39. Derogatis LR. BSI 18, Brief Symptom Inventory 18: Administration, scoring and  
56 procedures manual: NCS Pearson, Incorporated; 2001.  
57  
58  
59  
60

- 1  
2  
3 40. Galvao DA, Taaffe DR, Chambers SK, Fairman CM, Spry N, Joseph D, et al. Exercise  
4 intervention and sexual function in advanced prostate cancer: a randomised controlled trial.  
5  
6 BMJ Support Palliat Care. 2020.  
7  
8  
9  
10 41. Chambers SK, Hyde MK, Oliffe JL, Zajdlewicz L, Lowe A, Wootten AC, et al.  
11 Measuring masculinity in the context of chronic disease. *Psychology of Men & Masculinity*.  
12 2016;17(3):228-42.  
13  
14  
15  
16 42. Hyde MK, Zajdlewicz L, Wootten AC, Nelson CJ, Lowe A, Dunn J, et al. Medical  
17 Help-Seeking for Sexual Concerns in Prostate Cancer Survivors. *Sex Med*. 2016;4(1):e7-e17.  
18  
19  
20 43. Sturgiss EA, Rieger E, Haesler E, Ridd MJ, Douglas K, Galvin SL. Adaption and  
21 validation of the Working Alliance Inventory for General Practice: qualitative review and  
22 cross-sectional surveys. *Fam Pract*. 2019;36(4):516-22.  
23  
24  
25  
26 44. Tracey TJ, Kokotovic AM. Factor structure of the working alliance inventory.  
27 *Psychological Assessment: A journal of consulting and clinical psychology*. 1989;1(3):207.  
28  
29  
30 45. National Cancer Institute. Common terminology criteria for adverse events (CTCAE)  
31 2017  
32  
33 [https://ctep.cancer.gov/protocolDevelopment/electronic\\_applications/docs/CTCAE\\_v5\\_Quick](https://ctep.cancer.gov/protocolDevelopment/electronic_applications/docs/CTCAE_v5_Quick_Reference_5x7.pdf)  
34  
35 [Reference\\_5x7.pdf](https://ctep.cancer.gov/protocolDevelopment/electronic_applications/docs/CTCAE_v5_Quick_Reference_5x7.pdf).  
36  
37  
38  
39  
40  
41  
42 46. Keating NL, O'Malley AJ, Smith MR. Diabetes and cardiovascular disease during  
43 androgen deprivation therapy for prostate cancer. *J Clin Oncol*. 2006;24(27):4448-56.  
44  
45  
46 47. Smith MR, Lee H, Nathan DM. Insulin sensitivity during combined androgen blockade  
47 for prostate cancer. *J Clin Endocrinol Metab*. 2006;91(4):1305-8.  
48  
49  
50  
51 48. Lopez P, Taaffe DR, Newton RU, Spry N, Shannon T, Frydenberg M, et al. Can  
52 Exercise Adaptations Be Maintained in Men with Prostate Cancer Following Supervised  
53 Programmes? Implications to the COVID-19 Landscape of Urology and Clinical Exercise. *Eur*  
54 *Urol Open Sci*. 2020;21:47-50.  
55  
56  
57  
58  
59  
60



- 1  
2  
3 49. Bressi B, Iotti C, Cagliari M, Fugazzaro S, Cavuto S, Bergamaschi FAM, et al. Physical  
4 exercise habits, lifestyle behaviors, and motivation to change among men with prostate cancer:  
5 a cross-sectional study. *Support Care Cancer*. 2022.  
6  
7  
8  
9  
10 50. Galvão DA, Newton RU, Gardiner RA, Girgis A, Lepore SJ, Stiller A, et al.  
11 Compliance to exercise-oncology guidelines in prostate cancer survivors and associations with  
12 psychological distress, unmet supportive care needs, and quality of life. *Psychooncology*.  
13 2015;24(10):1241-9.  
14  
15  
16  
17 51. Galvão DA, Chambers SK. Exercise medicine in men with prostate cancer: breaking  
18 barriers to increase participation. *Prostate Cancer Prostatic Dis*. 2021;24(4):942-3.  
19  
20  
21  
22  
23  
24  
25  
26  
27  
28  
29  
30  
31  
32  
33  
34  
35  
36  
37  
38  
39  
40  
41  
42  
43  
44  
45  
46  
47  
48  
49  
50  
51  
52  
53  
54  
55  
56  
57  
58  
59  
60

1  
2  
3 **AUTHORS' CONTRIBUTIONS:** DAG, DRT, DH, PL, PLW, CT, SKC, NS, CK and RUN  
4  
5 collaboratively developed the concept and protocol, including intervention, outcomes of  
6  
7 interests, and planned data analysis procedures. AD, EJ, DJ further contributed to the study  
8  
9 protocol. DAG, DRT, DH, PL, PLW, CT, SKC, NS, CK and RUN contributed to writing,  
10  
11 reviewing, editing and final approval of the manuscript. AD, EJ, DJ further contributed to  
12  
13 editing and final approval of the manuscript.  
14  
15

16  
17 **FUNDING STATEMENT:** This work was supported by Cancer Council Western Australia  
18  
19 Prostate Cancer Research Initiative grant (2021-2023 Prostate Cancer Research Initiative).  
20  
21 DAG and RUN are funded by a NHMRC CRE in Prostate Cancer Survivorship. PL is  
22  
23 supported by the National Health and Medical Research Council (NHMRC) Centre of Research  
24  
25 Excellence (CRE) in Prostate Cancer Survivorship Scholarship.  
26  
27

28 **COMPETING INTERESTS STATEMENT:** None declared.  
29

30 **ETHICS APPROVAL:** Edith Cowan University Human Ethics Committee (ID: 2021-02157-  
31  
32 GALVAO)  
33  
34  
35  
36  
37  
38  
39  
40  
41  
42  
43  
44  
45  
46  
47  
48  
49  
50  
51  
52  
53  
54  
55  
56  
57  
58  
59  
60

1  
2  
3 **FIGURE LEGENDS**  
4

5 **Figure 1.** CONSORT diagram depicting the of participants throughout the trial.  
6

7  
8 **Figure 2.** Study design, exercise and nutrition interventions and timeline assessments.  
9  
10  
11  
12  
13  
14  
15  
16  
17  
18  
19  
20  
21  
22  
23  
24  
25  
26  
27  
28  
29  
30  
31  
32  
33  
34  
35  
36  
37  
38  
39  
40  
41  
42  
43  
44  
45  
46  
47  
48  
49  
50  
51  
52  
53  
54  
55  
56  
57  
58  
59  
60

For peer review only

1  
2  
3  
4  
5  
6  
7  
8  
9  
10  
11  
12  
13  
14  
15  
16  
17  
18  
19  
20  
21  
22  
23  
24  
25  
26  
27  
28  
29  
30  
31  
32  
33  
34  
35  
36  
37  
38  
39  
40  
41  
42  
43  
44

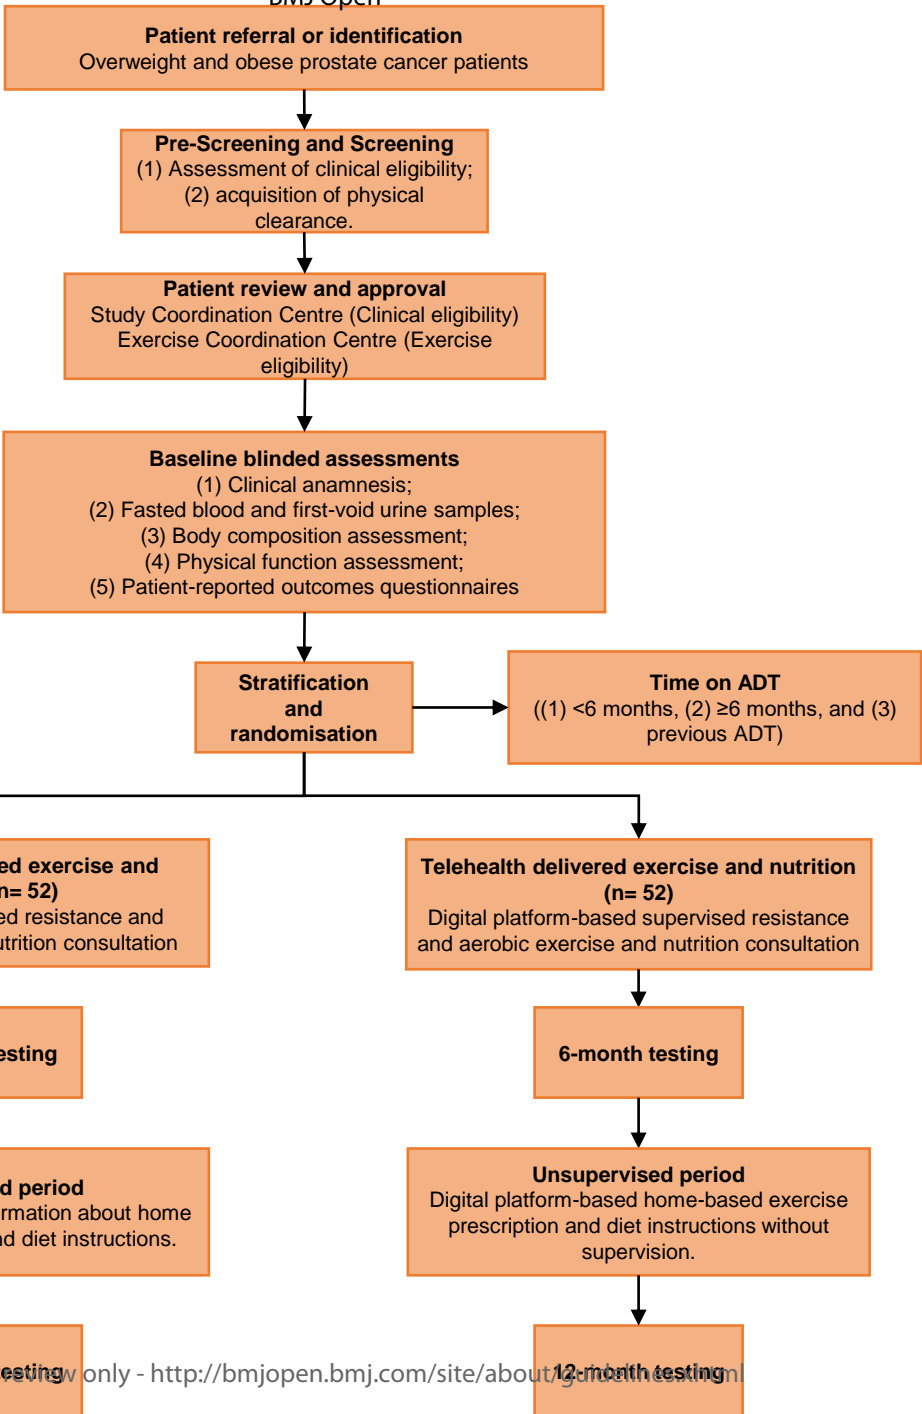

1  
2  
3  
4  
5  
6  
7  
8  
9  
10  
11  
12  
13  
14  
15  
16  
17  
18  
19  
20  
21  
22  
23  
24  
25  
26  
27  
28  
29  
30  
31  
32  
33  
34  
35  
36  
37  
38  
39  
40  
41  
42  
43  
44  
45  
46  
47  
48  
49  
50  
51  
52  
53  
54  
55  
56  
57  
58  
59  
60

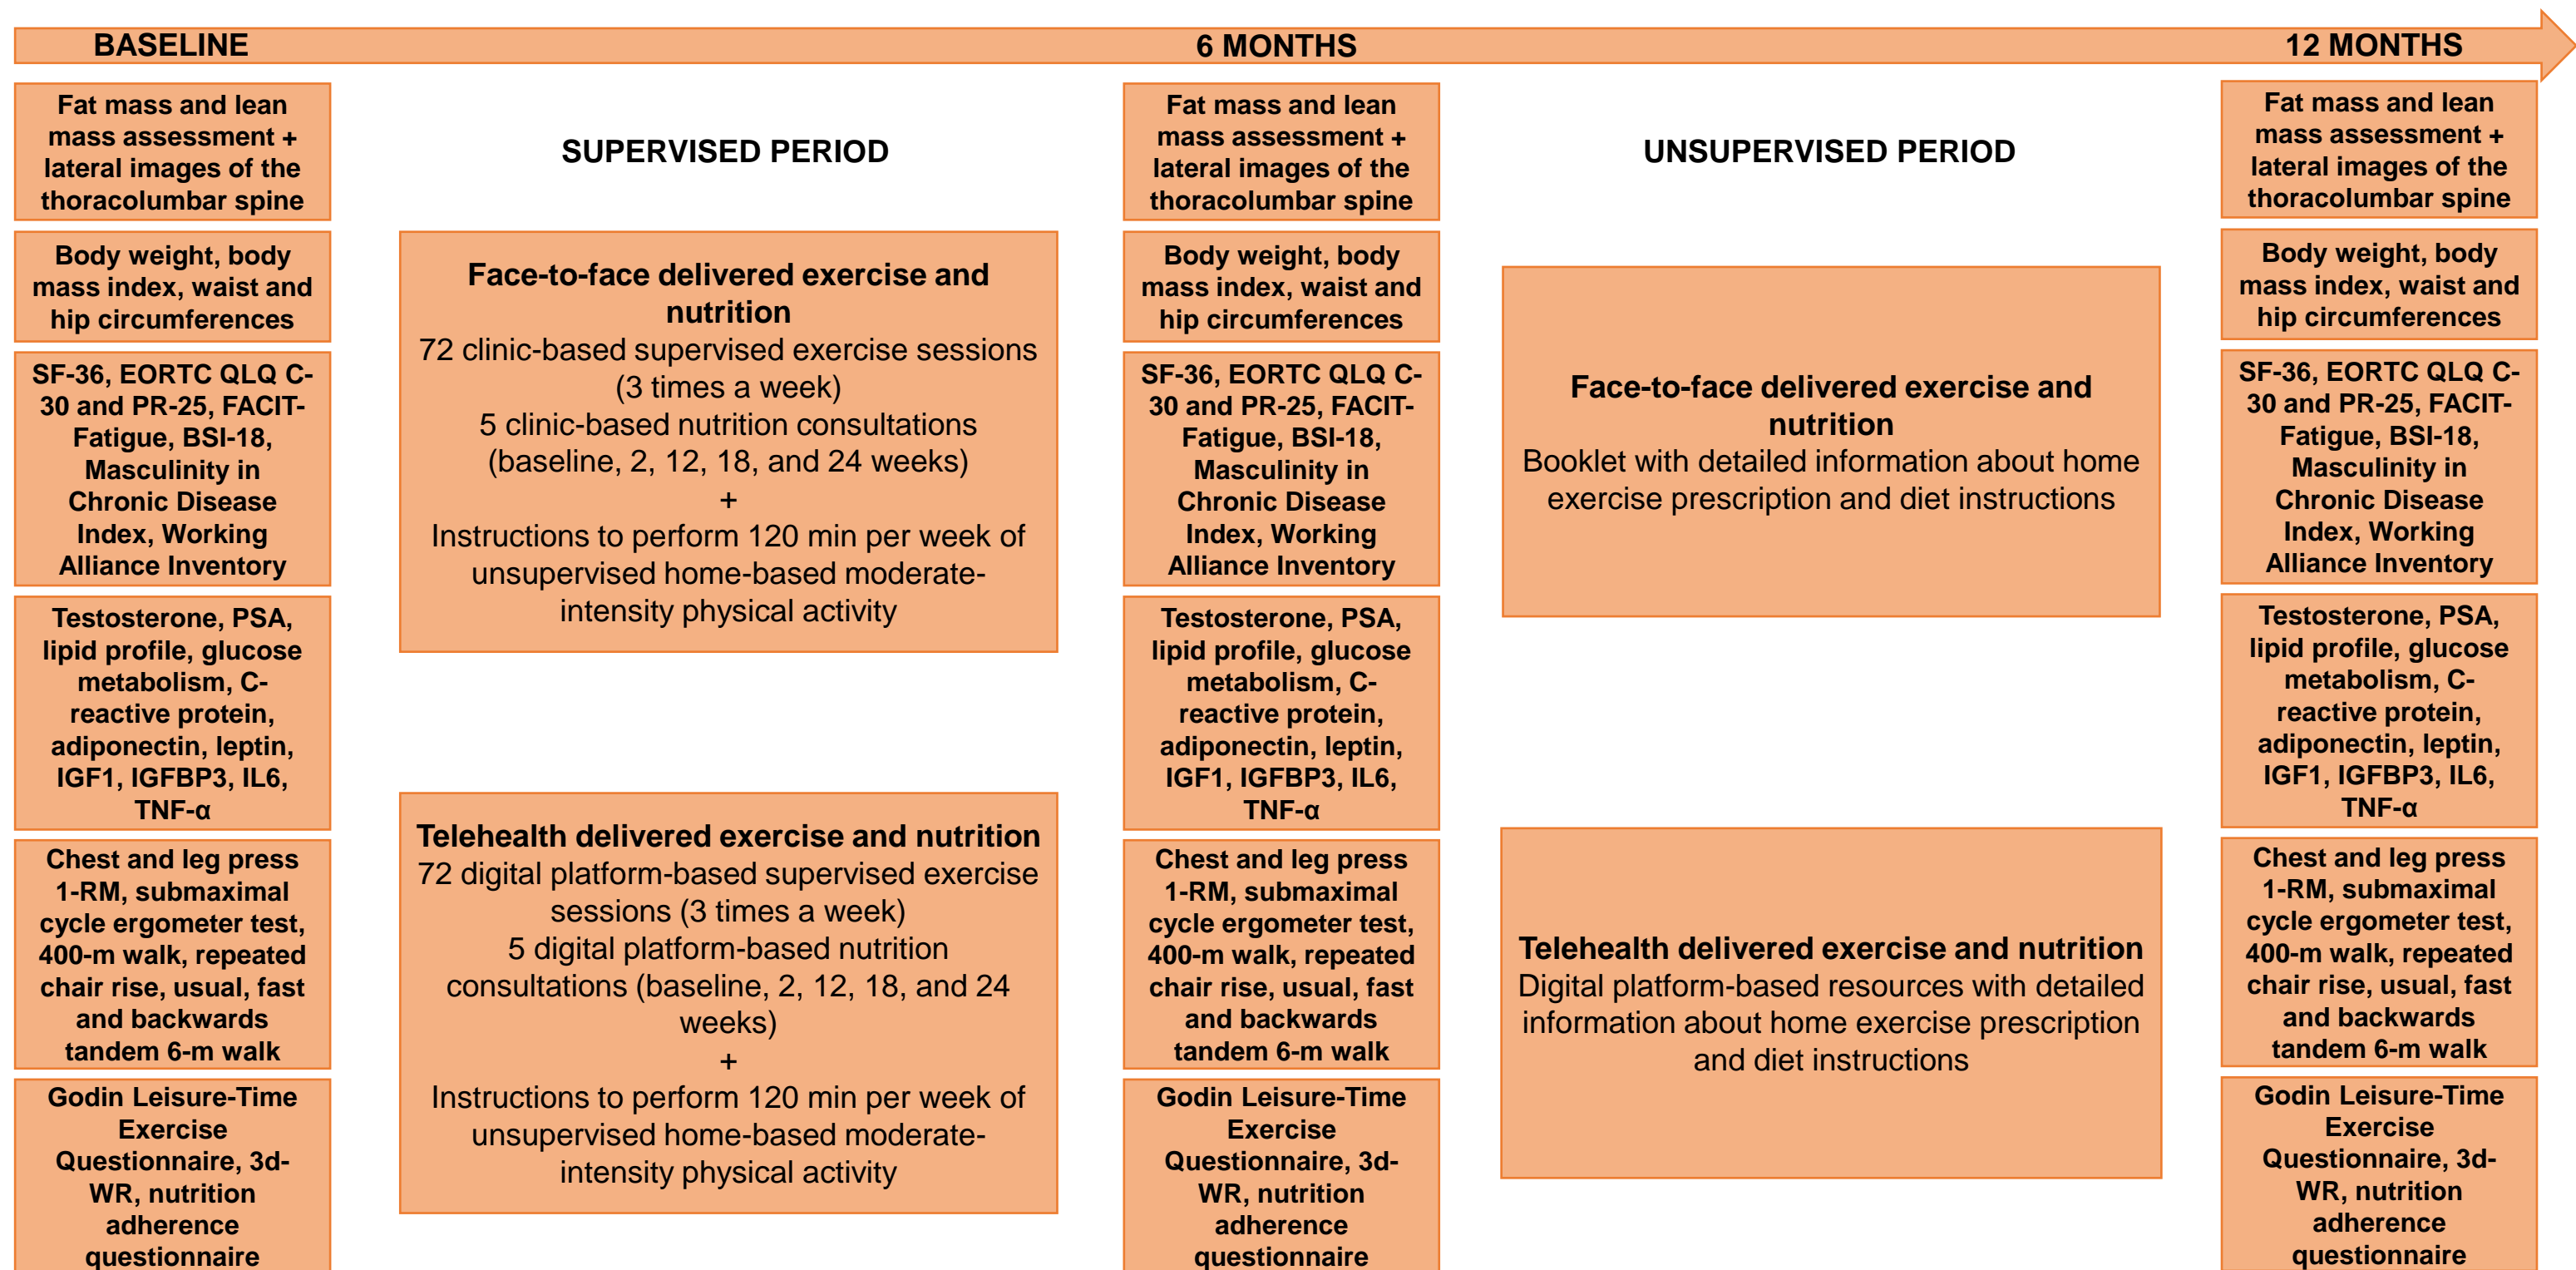

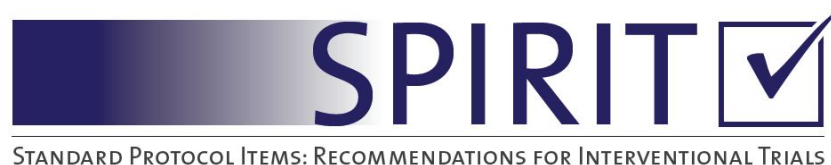

SPIRIT 2013 Checklist: Recommended items to address in a clinical trial protocol and related documents\*

| Section/item                      | Item No | Description                                                                                                                                                                                                                                                                              | Addressed on page number |
|-----------------------------------|---------|------------------------------------------------------------------------------------------------------------------------------------------------------------------------------------------------------------------------------------------------------------------------------------------|--------------------------|
| <b>Administrative information</b> |         |                                                                                                                                                                                                                                                                                          |                          |
| Title                             | 1       | Descriptive title identifying the study design, population, interventions, and, if applicable, trial acronym                                                                                                                                                                             | 1                        |
| Trial registration                | 2a      | Trial identifier and registry name. If not yet registered, name of intended registry                                                                                                                                                                                                     | 2 and 3                  |
|                                   | 2b      | All items from the World Health Organization Trial Registration Data Set                                                                                                                                                                                                                 | N/A                      |
| Protocol version                  | 3       | Date and version identifier                                                                                                                                                                                                                                                              | N/A                      |
| Funding                           | 4       | Sources and types of financial, material, and other support                                                                                                                                                                                                                              | 22                       |
| Roles and responsibilities        | 5a      | Names, affiliations, and roles of protocol contributors                                                                                                                                                                                                                                  | 1 and 22                 |
|                                   | 5b      | Name and contact information for the trial sponsor                                                                                                                                                                                                                                       | N/A                      |
|                                   | 5c      | Role of study sponsor and funders, if any, in study design; collection, management, analysis, and interpretation of data; writing of the report; and the decision to submit the report for publication, including whether they will have ultimate authority over any of these activities | N/A                      |
|                                   | 5d      | Composition, roles, and responsibilities of the coordinating centre, steering committee, endpoint adjudication committee, data management team, and other individuals or groups overseeing the trial, if applicable (see Item 21a for data monitoring committee)                         | N/A                      |

1 **Introduction**

2

3 Background and 6a Description of research question and justification for undertaking the trial, including summary of relevant 6-7  
 4 rationale studies (published and unpublished) examining benefits and harms for each intervention  
 5

6 6b Explanation for choice of comparators 6-7  
 7

8 Objectives 7 Specific objectives or hypotheses 6-7  
 9

10 Trial design 8 Description of trial design including type of trial (eg, parallel group, crossover, factorial, single group),  
 11 allocation ratio, and framework (eg, superiority, equivalence, noninferiority, exploratory) 7  
 12  
 13

14 **Methods: Participants, interventions, and outcomes**

15

16 Study setting 9 Description of study settings (eg, community clinic, academic hospital) and list of countries where data will 7-8  
 17 be collected. Reference to where list of study sites can be obtained  
 18

19 Eligibility criteria 10 Inclusion and exclusion criteria for participants. If applicable, eligibility criteria for study centres and 7-8  
 20 individuals who will perform the interventions (eg, surgeons, psychotherapists)  
 21

22 Interventions 11a Interventions for each group with sufficient detail to allow replication, including how and when they will be 12-13  
 23 administered  
 24

25 11b Criteria for discontinuing or modifying allocated interventions for a given trial participant (eg, drug dose N/A  
 26 change in response to harms, participant request, or improving/worsening disease)  
 27

28 11c Strategies to improve adherence to intervention protocols, and any procedures for monitoring adherence 10-11  
 29 (eg, drug tablet return, laboratory tests)  
 30

31 11d Relevant concomitant care and interventions that are permitted or prohibited during the trial N/A  
 32  
 33

34 Outcomes 12 Primary, secondary, and other outcomes, including the specific measurement variable (eg, systolic blood 9-12  
 35 pressure), analysis metric (eg, change from baseline, final value, time to event), method of aggregation (eg,  
 36 median, proportion), and time point for each outcome. Explanation of the clinical relevance of chosen  
 37 efficacy and harm outcomes is strongly recommended  
 38

39 Participant timeline 13 Time schedule of enrolment, interventions (including any run-ins and washouts), assessments, and visits for 9 and Figure 2  
 40 participants. A schematic diagram is highly recommended (see Figure)  
 41  
 42

1 Sample size 14 Estimated number of participants needed to achieve study objectives and how it was determined, including 13-14  
 2 clinical and statistical assumptions supporting any sample size calculations

3  
 4 Recruitment 15 Strategies for achieving adequate participant enrolment to reach target sample size 7-8  
 5

6 **Methods: Assignment of interventions (for controlled trials)**  
 7

8 Allocation:  
 9

10 Sequence 16a Method of generating the allocation sequence (eg, computer-generated random numbers), and list of any 9  
 11 generation factors for stratification. To reduce predictability of a random sequence, details of any planned restriction  
 12 (eg, blocking) should be provided in a separate document that is unavailable to those who enrol participants  
 13 or assign interventions  
 14  
 15

16 Allocation 16b Mechanism of implementing the allocation sequence (eg, central telephone; sequentially numbered, 9  
 17 concealment opaque, sealed envelopes), describing any steps to conceal the sequence until interventions are assigned  
 18 mechanism  
 19

20 Implementation 16c Who will generate the allocation sequence, who will enrol participants, and who will assign participants to 9  
 21 interventions  
 22  
 23

24 Blinding (masking) 17a Who will be blinded after assignment to interventions (eg, trial participants, care providers, outcome 7 and 9  
 25 assessors, data analysts), and how  
 26

27 17b If blinded, circumstances under which unblinding is permissible, and procedure for revealing a participant's 9  
 28 allocated intervention during the trial  
 29  
 30

31 **Methods: Data collection, management, and analysis**  
 32

33 Data collection 18a Plans for assessment and collection of outcome, baseline, and other trial data, including any related 9-12  
 34 methods processes to promote data quality (eg, duplicate measurements, training of assessors) and a description of  
 35 study instruments (eg, questionnaires, laboratory tests) along with their reliability and validity, if known.  
 36 Reference to where data collection forms can be found, if not in the protocol  
 37

38 18b Plans to promote participant retention and complete follow-up, including list of any outcome data to be 9-12  
 39 collected for participants who discontinue or deviate from intervention protocols  
 40  
 41  
 42



|    |                                 |     |                                                                                                                                                                                                                                                                                                                                       |       |
|----|---------------------------------|-----|---------------------------------------------------------------------------------------------------------------------------------------------------------------------------------------------------------------------------------------------------------------------------------------------------------------------------------------|-------|
| 1  | Data management                 | 19  | Plans for data entry, coding, security, and storage, including any related processes to promote data quality (eg, double data entry; range checks for data values). Reference to where details of data management procedures can be found, if not in the protocol                                                                     | N/A   |
| 2  |                                 |     |                                                                                                                                                                                                                                                                                                                                       |       |
| 3  |                                 |     |                                                                                                                                                                                                                                                                                                                                       |       |
| 4  |                                 |     |                                                                                                                                                                                                                                                                                                                                       |       |
| 5  | Statistical methods             | 20a | Statistical methods for analysing primary and secondary outcomes. Reference to where other details of the statistical analysis plan can be found, if not in the protocol                                                                                                                                                              | 13-14 |
| 6  |                                 |     |                                                                                                                                                                                                                                                                                                                                       |       |
| 7  |                                 |     |                                                                                                                                                                                                                                                                                                                                       |       |
| 8  |                                 | 20b | Methods for any additional analyses (eg, subgroup and adjusted analyses)                                                                                                                                                                                                                                                              | 13-14 |
| 9  |                                 |     |                                                                                                                                                                                                                                                                                                                                       |       |
| 10 |                                 | 20c | Definition of analysis population relating to protocol non-adherence (eg, as randomised analysis), and any statistical methods to handle missing data (eg, multiple imputation)                                                                                                                                                       | 13-14 |
| 11 |                                 |     |                                                                                                                                                                                                                                                                                                                                       |       |
| 12 |                                 |     |                                                                                                                                                                                                                                                                                                                                       |       |
| 13 |                                 |     |                                                                                                                                                                                                                                                                                                                                       |       |
| 14 | <b>Methods: Monitoring</b>      |     |                                                                                                                                                                                                                                                                                                                                       |       |
| 15 |                                 |     |                                                                                                                                                                                                                                                                                                                                       |       |
| 16 | Data monitoring                 | 21a | Composition of data monitoring committee (DMC); summary of its role and reporting structure; statement of whether it is independent from the sponsor and competing interests; and reference to where further details about its charter can be found, if not in the protocol. Alternatively, an explanation of why a DMC is not needed | N/A   |
| 17 |                                 |     |                                                                                                                                                                                                                                                                                                                                       |       |
| 18 |                                 |     |                                                                                                                                                                                                                                                                                                                                       |       |
| 19 |                                 |     |                                                                                                                                                                                                                                                                                                                                       |       |
| 20 |                                 |     |                                                                                                                                                                                                                                                                                                                                       |       |
| 21 |                                 |     |                                                                                                                                                                                                                                                                                                                                       |       |
| 22 |                                 | 21b | Description of any interim analyses and stopping guidelines, including who will have access to these interim results and make the final decision to terminate the trial                                                                                                                                                               | N/A   |
| 23 |                                 |     |                                                                                                                                                                                                                                                                                                                                       |       |
| 24 |                                 |     |                                                                                                                                                                                                                                                                                                                                       |       |
| 25 | Harms                           | 22  | Plans for collecting, assessing, reporting, and managing solicited and spontaneously reported adverse events and other unintended effects of trial interventions or trial conduct                                                                                                                                                     | 12-13 |
| 26 |                                 |     |                                                                                                                                                                                                                                                                                                                                       |       |
| 27 |                                 |     |                                                                                                                                                                                                                                                                                                                                       |       |
| 28 | Auditing                        | 23  | Frequency and procedures for auditing trial conduct, if any, and whether the process will be independent from investigators and the sponsor                                                                                                                                                                                           | N/A   |
| 29 |                                 |     |                                                                                                                                                                                                                                                                                                                                       |       |
| 30 |                                 |     |                                                                                                                                                                                                                                                                                                                                       |       |
| 31 |                                 |     |                                                                                                                                                                                                                                                                                                                                       |       |
| 32 | <b>Ethics and dissemination</b> |     |                                                                                                                                                                                                                                                                                                                                       |       |
| 33 |                                 |     |                                                                                                                                                                                                                                                                                                                                       |       |
| 34 | Research ethics approval        | 24  | Plans for seeking research ethics committee/institutional review board (REC/IRB) approval                                                                                                                                                                                                                                             | 7     |
| 35 |                                 |     |                                                                                                                                                                                                                                                                                                                                       |       |
| 36 |                                 |     |                                                                                                                                                                                                                                                                                                                                       |       |
| 37 | Protocol amendments             | 25  | Plans for communicating important protocol modifications (eg, changes to eligibility criteria, outcomes, analyses) to relevant parties (eg, investigators, REC/IRBs, trial participants, trial registries, journals, regulators)                                                                                                      | N/A   |
| 38 |                                 |     |                                                                                                                                                                                                                                                                                                                                       |       |
| 39 |                                 |     |                                                                                                                                                                                                                                                                                                                                       |       |
| 40 |                                 |     |                                                                                                                                                                                                                                                                                                                                       |       |
| 41 |                                 |     |                                                                                                                                                                                                                                                                                                                                       |       |
| 42 |                                 |     |                                                                                                                                                                                                                                                                                                                                       |       |
| 43 |                                 |     |                                                                                                                                                                                                                                                                                                                                       |       |
| 44 |                                 |     |                                                                                                                                                                                                                                                                                                                                       |       |
| 45 |                                 |     |                                                                                                                                                                                                                                                                                                                                       |       |
| 46 |                                 |     |                                                                                                                                                                                                                                                                                                                                       |       |

|    |                               |     |                                                                                                                                                                                                                                                                                     |                        |
|----|-------------------------------|-----|-------------------------------------------------------------------------------------------------------------------------------------------------------------------------------------------------------------------------------------------------------------------------------------|------------------------|
| 1  | Consent or assent             | 26a | Who will obtain informed consent or assent from potential trial participants or authorised surrogates, and how (see Item 32)                                                                                                                                                        | 7-8                    |
| 2  |                               |     |                                                                                                                                                                                                                                                                                     |                        |
| 3  |                               |     |                                                                                                                                                                                                                                                                                     |                        |
| 4  |                               | 26b | Additional consent provisions for collection and use of participant data and biological specimens in ancillary studies, if applicable                                                                                                                                               | N/A                    |
| 5  |                               |     |                                                                                                                                                                                                                                                                                     |                        |
| 6  |                               |     |                                                                                                                                                                                                                                                                                     |                        |
| 7  | Confidentiality               | 27  | How personal information about potential and enrolled participants will be collected, shared, and maintained in order to protect confidentiality before, during, and after the trial                                                                                                | 7-8                    |
| 8  |                               |     |                                                                                                                                                                                                                                                                                     |                        |
| 9  |                               |     |                                                                                                                                                                                                                                                                                     |                        |
| 10 | Declaration of interests      | 28  | Financial and other competing interests for principal investigators for the overall trial and each study site                                                                                                                                                                       | 22                     |
| 11 |                               |     |                                                                                                                                                                                                                                                                                     |                        |
| 12 |                               |     |                                                                                                                                                                                                                                                                                     |                        |
| 13 | Access to data                | 29  | Statement of who will have access to the final trial dataset, and disclosure of contractual agreements that limit such access for investigators                                                                                                                                     | 7-8                    |
| 14 |                               |     |                                                                                                                                                                                                                                                                                     |                        |
| 15 |                               |     |                                                                                                                                                                                                                                                                                     |                        |
| 16 | Ancillary and post-trial care | 30  | Provisions, if any, for ancillary and post-trial care, and for compensation to those who suffer harm from trial participation                                                                                                                                                       | N/A                    |
| 17 |                               |     |                                                                                                                                                                                                                                                                                     |                        |
| 18 |                               |     |                                                                                                                                                                                                                                                                                     |                        |
| 19 |                               |     |                                                                                                                                                                                                                                                                                     |                        |
| 20 | Dissemination policy          | 31a | Plans for investigators and sponsor to communicate trial results to participants, healthcare professionals, the public, and other relevant groups (eg, via publication, reporting in results databases, or other data sharing arrangements), including any publication restrictions | 4 and 14               |
| 21 |                               |     |                                                                                                                                                                                                                                                                                     |                        |
| 22 |                               |     |                                                                                                                                                                                                                                                                                     |                        |
| 23 |                               |     |                                                                                                                                                                                                                                                                                     |                        |
| 24 |                               | 31b | Authorship eligibility guidelines and any intended use of professional writers                                                                                                                                                                                                      | N/A                    |
| 25 |                               |     |                                                                                                                                                                                                                                                                                     |                        |
| 26 |                               | 31c | Plans, if any, for granting public access to the full protocol, participant-level dataset, and statistical code                                                                                                                                                                     | N/A                    |
| 27 |                               |     |                                                                                                                                                                                                                                                                                     |                        |
| 28 |                               |     |                                                                                                                                                                                                                                                                                     |                        |
| 29 | <b>Appendices</b>             |     |                                                                                                                                                                                                                                                                                     |                        |
| 30 |                               |     |                                                                                                                                                                                                                                                                                     |                        |
| 31 | Informed consent materials    | 32  | Model consent form and other related documentation given to participants and authorised surrogates                                                                                                                                                                                  | Supplementary material |
| 32 |                               |     |                                                                                                                                                                                                                                                                                     |                        |
| 33 |                               |     |                                                                                                                                                                                                                                                                                     |                        |
| 34 | Biological specimens          | 33  | Plans for collection, laboratory evaluation, and storage of biological specimens for genetic or molecular analysis in the current trial and for future use in ancillary studies, if applicable                                                                                      | N/A                    |
| 35 |                               |     |                                                                                                                                                                                                                                                                                     |                        |
| 36 |                               |     |                                                                                                                                                                                                                                                                                     |                        |

\*It is strongly recommended that this checklist be read in conjunction with the SPIRIT 2013 Explanation & Elaboration for important clarification on the items. Amendments to the protocol should be tracked and dated. The SPIRIT checklist is copyrighted by the SPIRIT Group under the Creative Commons [“Attribution-NonCommercial-NoDerivs 3.0 Unported”](https://creativecommons.org/licenses/by-nc-nd/3.0/) license.
